# Supplementary material
Source: PubMed Central journal article supplement (PMC9379553)
Supplement: EMBJ-41-e108791-s004.pdf [file EMBJ-41-e108791-s004.pdf]

## Expanded View Figures

**Fig EV1. A gain of function screen identifies USP8 as a metastasis-activator.**

- A DUB activity profiling in cells by using biotin-Ub-VME pull-down assay.
- B Biotin ABP analysis of USP8 in breast cancer cell lines (left) and patients tumor samples (right).
- C OncoPrint data analysis of USP8 expression in Melanoma, IBC (Invasive Breast Carcinoma), TBC (Tubular Breast Carcinoma) vs. normal tissues.
- D Viable cell number counts in control (Co.) and USP8 stably depleted-MDA-MB-231 cells (with two independent shRNA: #1 and #2).
- E Left panel: representative pictures of transwell assay performed in control or USP8 stably depleted-MCF10A-RAS (MII) cells. Quantification of migrated cells was shown in the right panel.
- F Quantification of the CD44<sup>high</sup>/CD24<sup>low</sup> population in control (Co.) and USP8 stably depleted-MDA-MB-231 cells (with two independent shRNA: #1 and #2) ( $n = 3$  per group).
- G A representative flow cytometric analysis of control (Co.) and USP8 stably depleted-MDA-MB-231 cells (with two independent shRNA: #1 and #2) stained for CD24 and CD44.

Data information: \* $P < 0.05$  (two-tailed Student's  $t$  test (C, E, F)). Data are shown as mean + SD (E) or as means  $\pm$  SD (C, D, F).

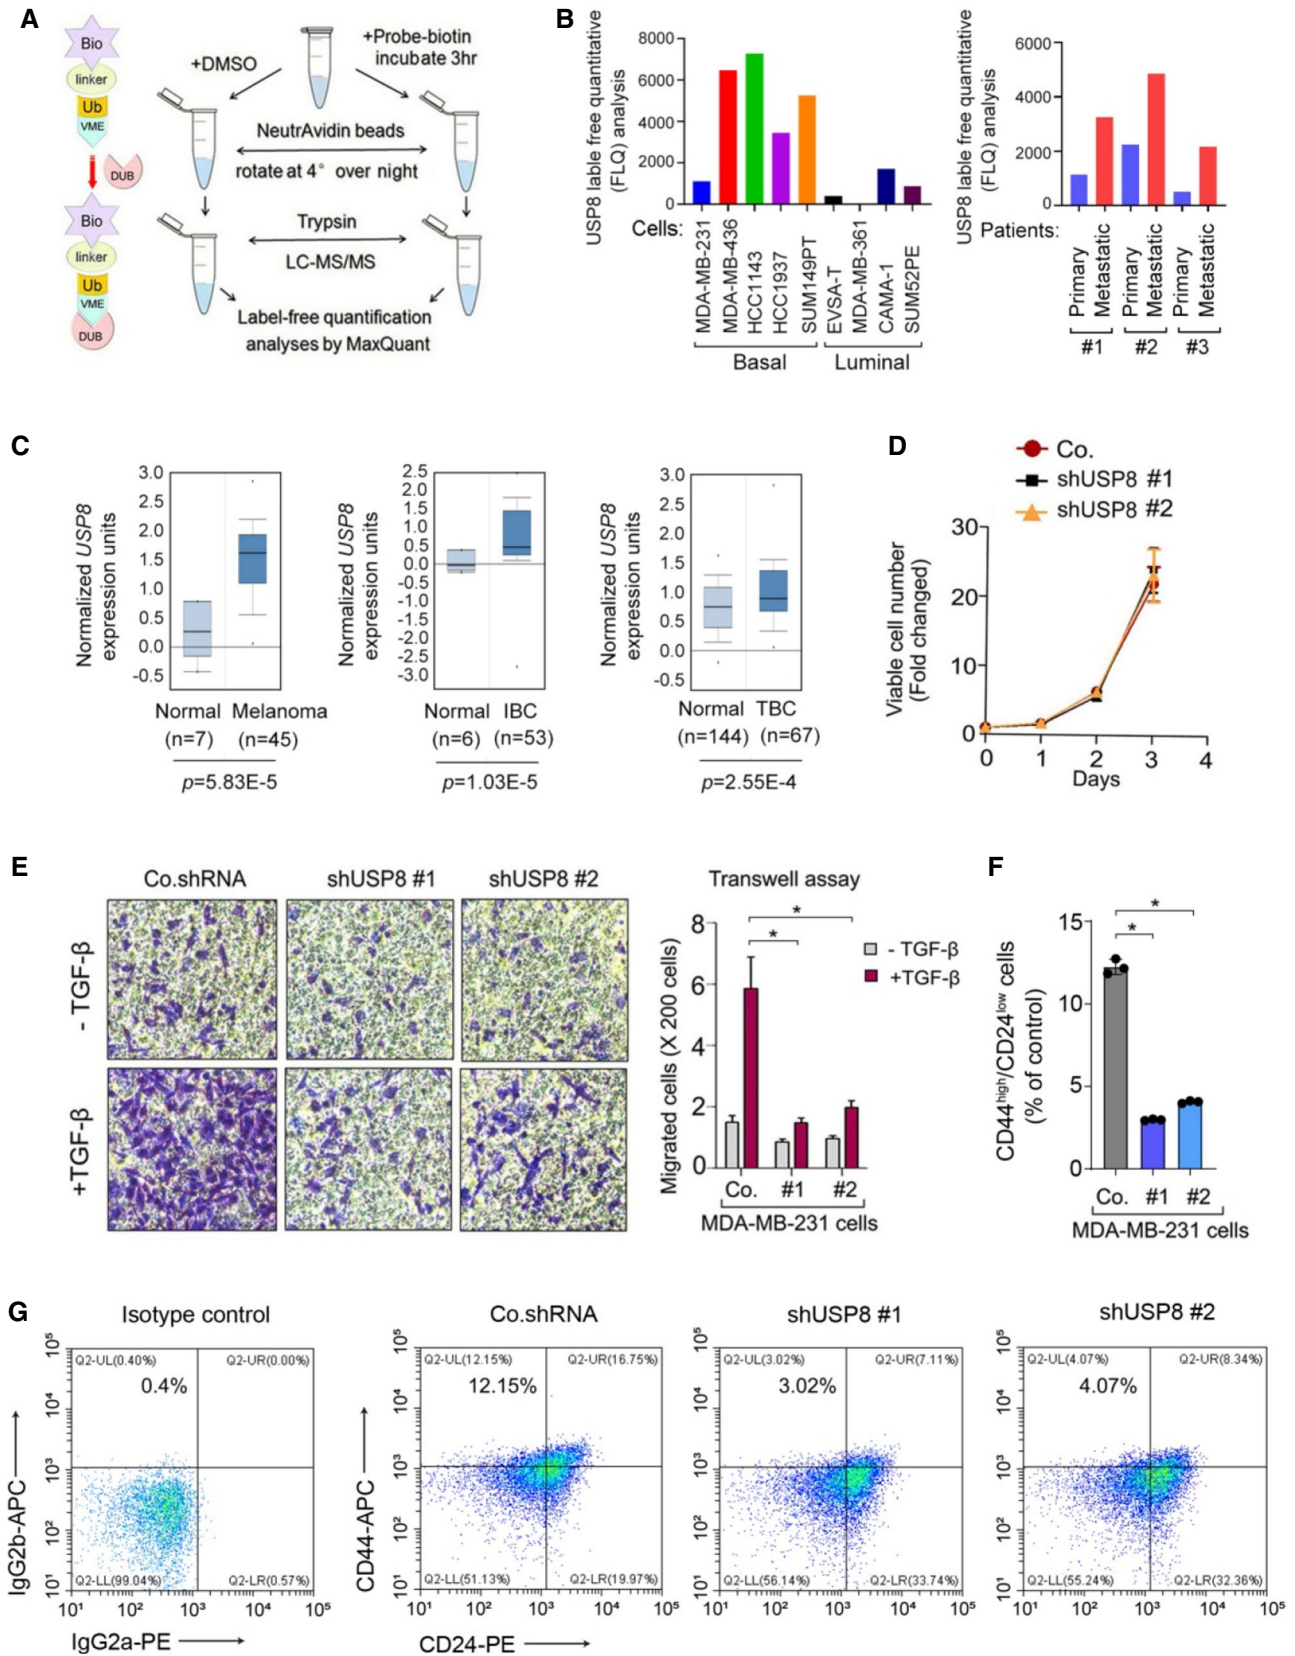

Fig EV1.

**Fig EV2. Loss of USP8 increases the percentage of CD8<sup>+</sup> T cells from lymph nodes and spleen.**

- A FACS analysis (left) and Quantification of T $\beta$ R11 in purified EVs from various types of cancer cell lines: metastatic breast cancer cells (MDA-MB-231), colorectal cancer cells (MC38 and HCT116), melanoma B16 or lung cancer cells (A549).
- B ELISA analysis of T $\beta$ R11 in purified EVs from various types of cancer cell lines: metastatic breast cancer cells (MDA-MB-231), colorectal cancer cells (MC38 and HCT116), melanoma B16 or lung cancer cells (A549).
- C EVs concentration by nanosight of 4T1 and MDA-MB-231 cells infected with lentivirus encoding control shRNA (Co.sh) or USP8 shRNA.
- D Quantification of the percentage of T $\beta$ R11<sup>+</sup> EVs in plasma samples from mice at day 42.
- E-G Experimental analysis *in vivo*: BALB/c mice were nipple injected with control and USP8 stably depleted-4T1 cells ( $5 \times 10^5$  cells per mouse), followed by tail vein-injection of Co.EVs or T $\beta$ R11<sup>+</sup> EVs (50  $\mu$ g per mouse every other day) for 3 weeks ( $n = 5$  per group) (E). Bright view of primary tumor from each group at week 3 (left) and tumor volume measured in time (right) (F). Percentage of lung metastasis area of all mice (left) and representative HE stained lung sections (right) from each group at week 3 (G). Scale bar, 1 mm.

Data information: \* $P < 0.05$  (two-tailed Student's  $t$  test (A, C, D, G) or two-way ANOVA (B, F)). Data are shown as mean + SD (A, C) or as means  $\pm$  SD (B, D, F, G).

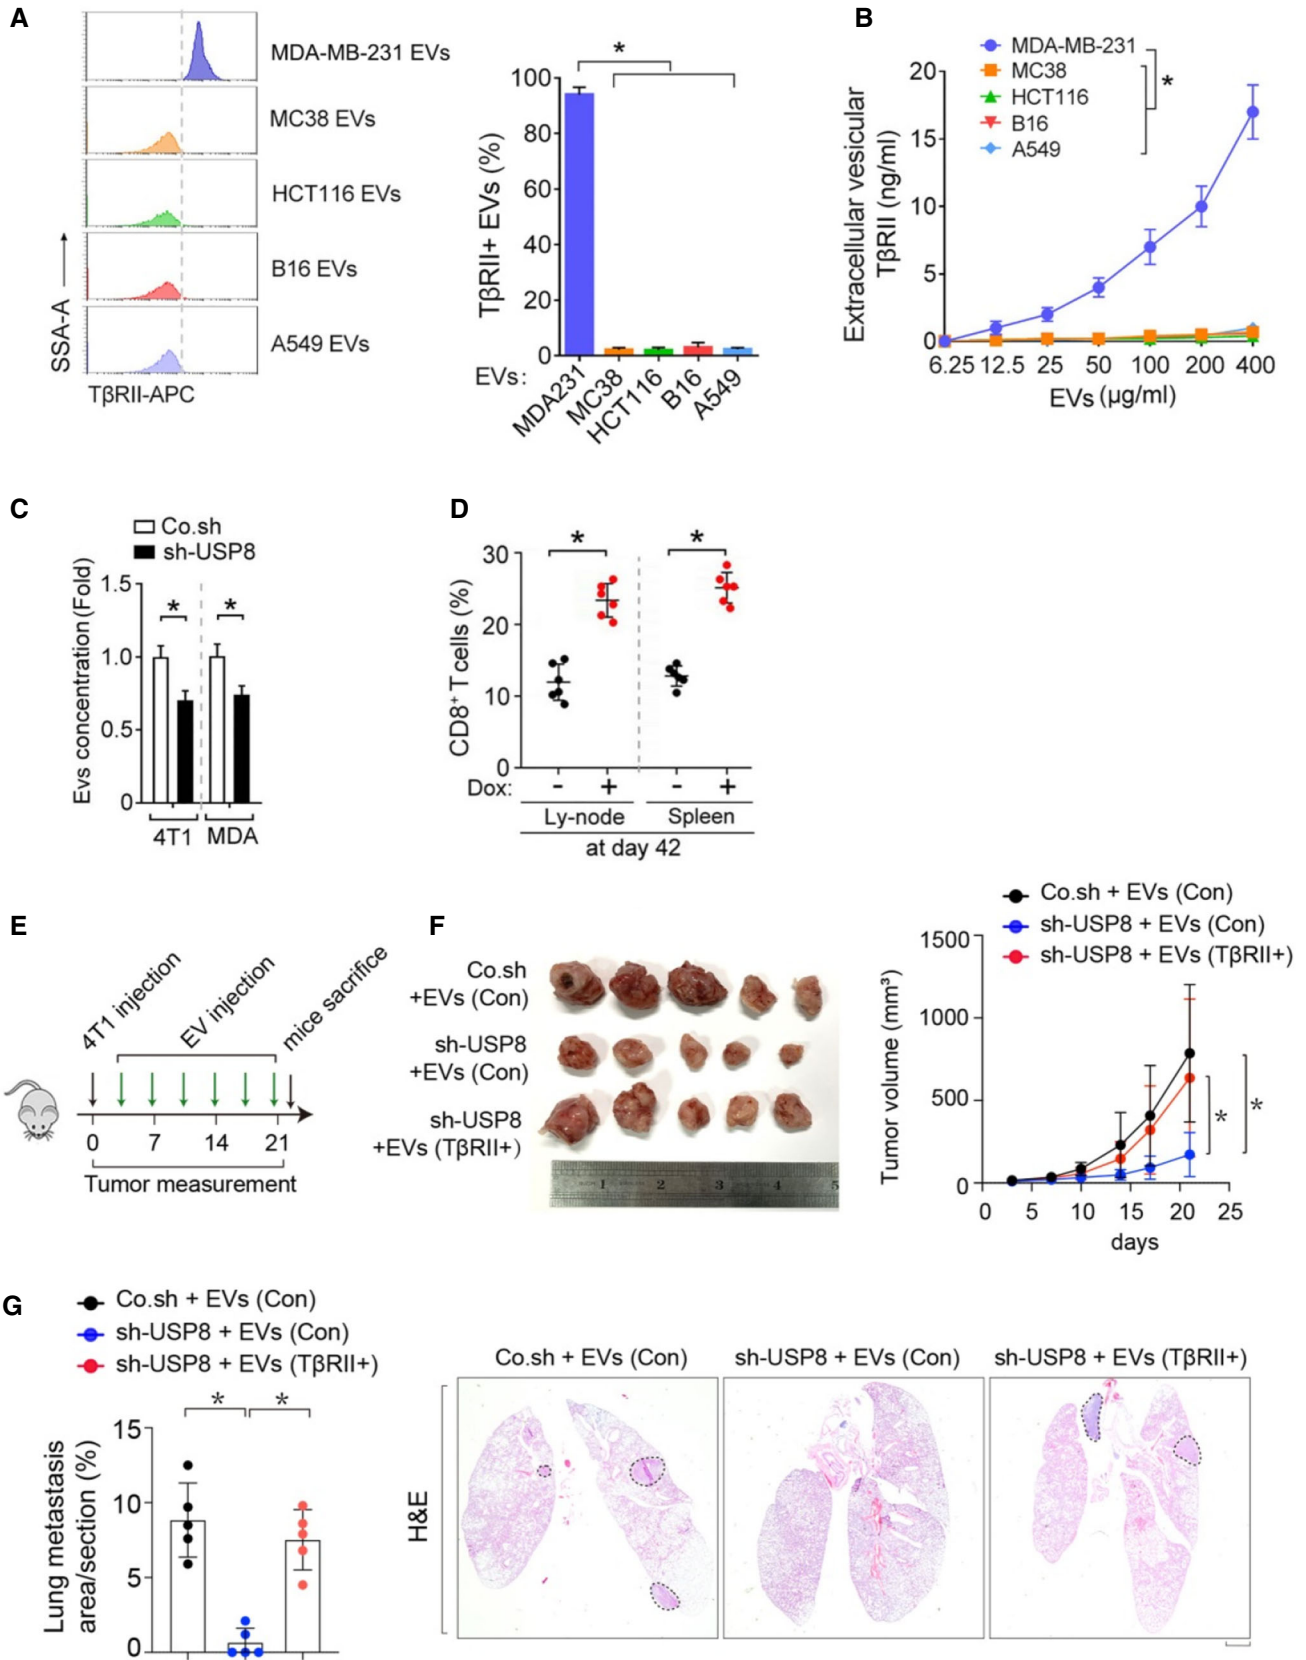

Fig EV2.

**Fig EV3. USP8 inhibitor represses cancer progression and metastasis.**

- A Normalized T $\beta$ RII mRNA expression from MDA-MB-231 breast cancer cells treated with USP8 inhibitor and TGF- $\beta$  (2.5 ng/ml) as indicated.
- B Pre-ranked gene set enrichment analysis (GSEA) in MDA-MB-231 cells treated with control DMSO versus USP8 inhibitor (2  $\mu$ M) for 24 h. The consensus signature of the genes correlated with various breast tumor characteristics that enriched in cells with normal USP8 activity (control) or cells with suppressed USP8 activity (USP8 inhibitor) were shown.
- C–F Experimental analysis *in vivo*: MDA-MB-231-Luc cells ( $1 \times 10^5$  per mouse) were intracardially injected into nude mice ( $n = 5$  for each group). After 3 weeks, USP8 inhibitor (1 mg/kg) was injected via intraperitoneal injection every the other day for three weeks. BLI signals (left panel) and BLI imaging of three representative nude mice from each group at week 6 (right panel) were shown (C). Number of bone metastasis nodules (D). Percentage of T $\beta$ RII<sup>+</sup> crEVs in plasma samples from mice (E). Immunoblot analysis of metastatic tumor nodule in mice (F).

Data information: \* $P < 0.05$  (two-tailed Student's *t* test (A, D, E) or two-way ANOVA (C)). Data are shown as mean  $\pm$  SD (A, C, D, E).

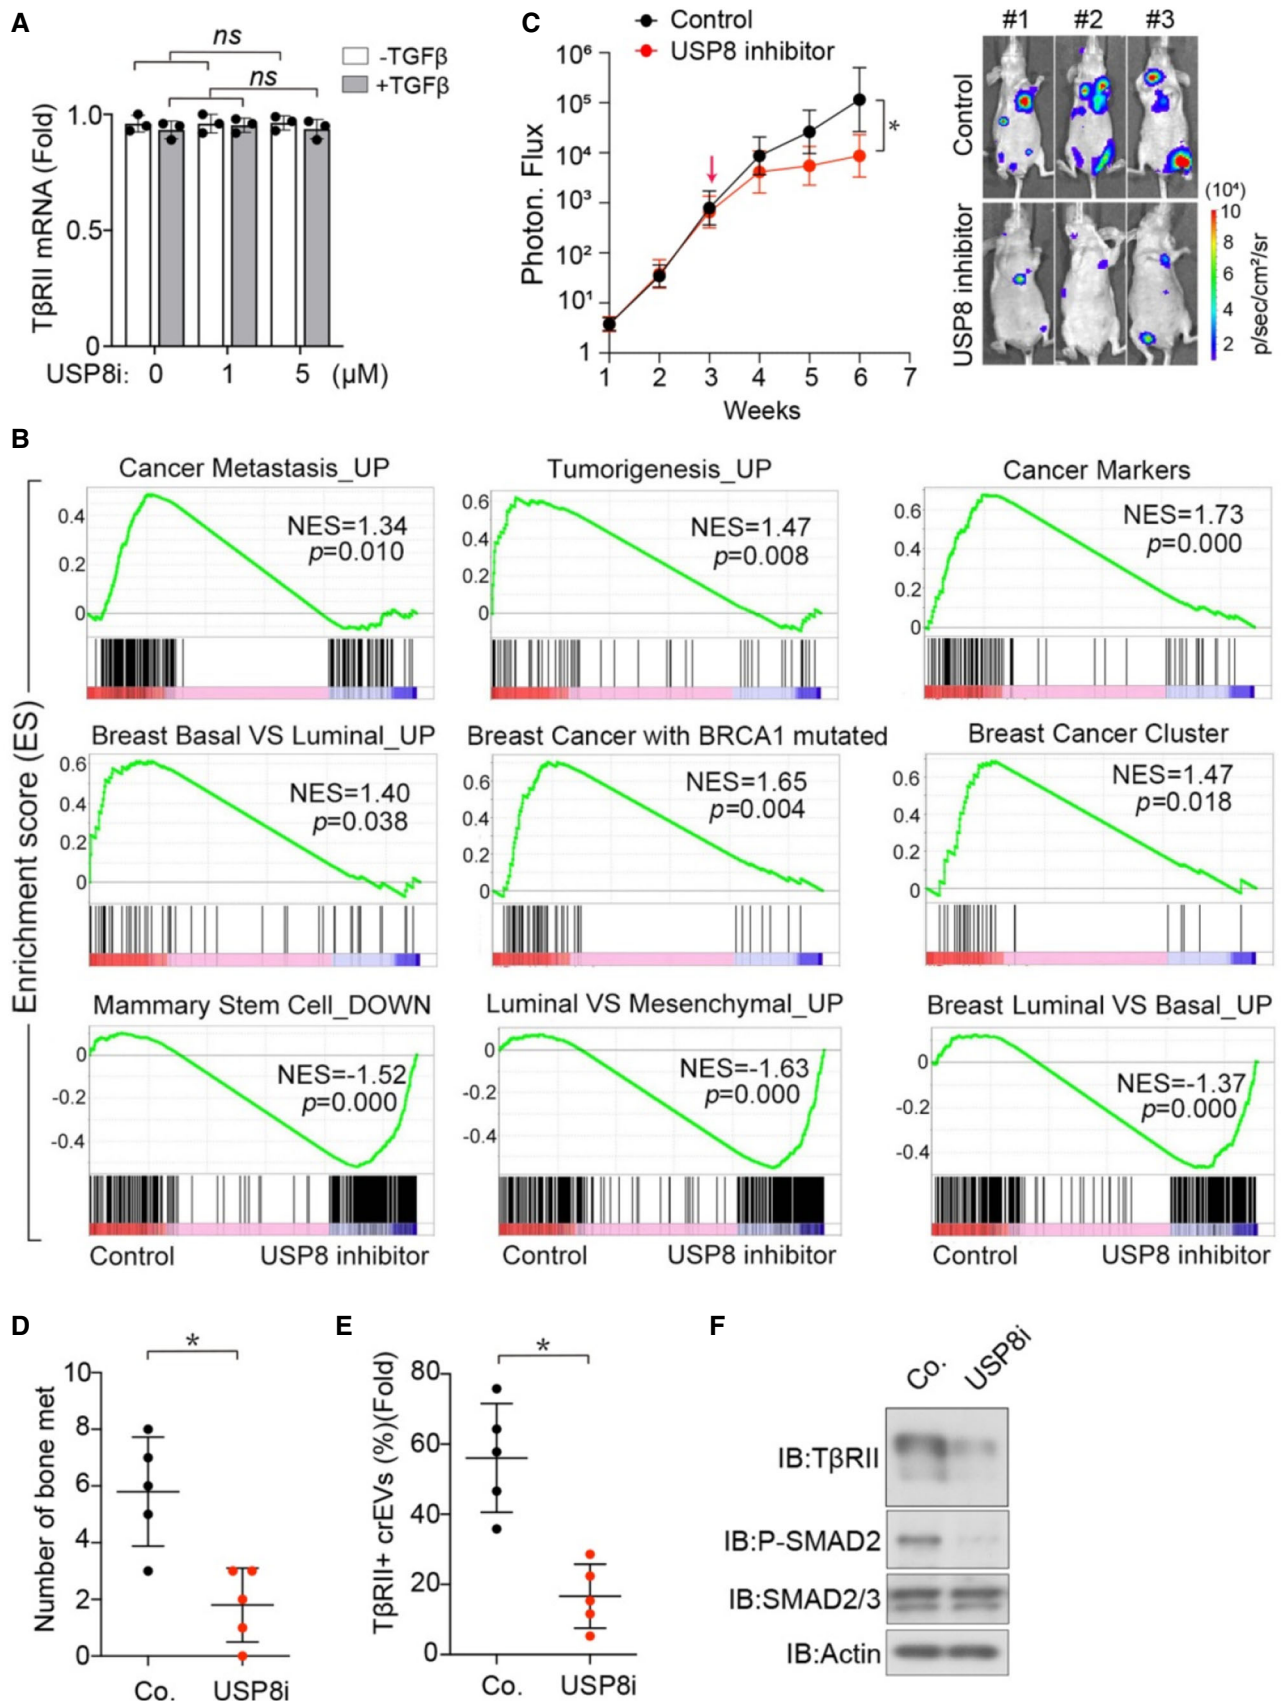

Fig EV3.

**Fig EV4. T $\beta$ R11<sup>+</sup> EVs increase tumor growth and metastasis *in vivo*.**

- A, B Transwell migration assay (A) and transwell invasion assay (B) using MDA-MB-231 cells co-cultured with Co.EVs or T $\beta$ R11<sup>+</sup> or T $\beta$ R11<sup>-</sup> EVs (50  $\mu$ g) for 48 h. Representative figures from three independent experiments are shown. The quantification of migrated cells per field is shown in the bar graphs; mean  $\pm$  SD.
- C The cellular proliferation of CD8<sup>+</sup> T cells was analyzed using a 4-day CFSE dilution assay.
- D T cell-mediated cancer cell killing assay: MDA-MB-231 cells co-cultured with or without activated T cells for 48 h were subjected to crystal violet staining (left). MDA-MB-231-to-T cell ratio = 1:3. Quantification of cytotoxicity of T cells (right).
- E–H Experimental analysis *in vivo*: BALB/c mice were nipple injected with 4T1 cells ( $5 \times 10^5$  cells per mouse), followed by tail vein-injection of Co.EVs or T $\beta$ R11<sup>+</sup> or T $\beta$ R11<sup>-</sup> EVs (50  $\mu$ g per mouse every other day) for 3 weeks ( $n = 5$  per group) (E). Tumor volume measured in time (F). Percentage of T $\beta$ R11<sup>+</sup> crEVs in plasma of all mice in each group at week 3 (G). Percentage of lung metastasis area of all mice (left) and representative HE stained lung sections (right) from each group at week 3 (H). Scale bar, 1 mm.

Data information: \* $P < 0.05$  (two-tailed Student's *t* test (A, B, D, G, H) or two-way ANOVA (F)). Data are shown as mean  $\pm$  SD (A, B, D, F, G, H).

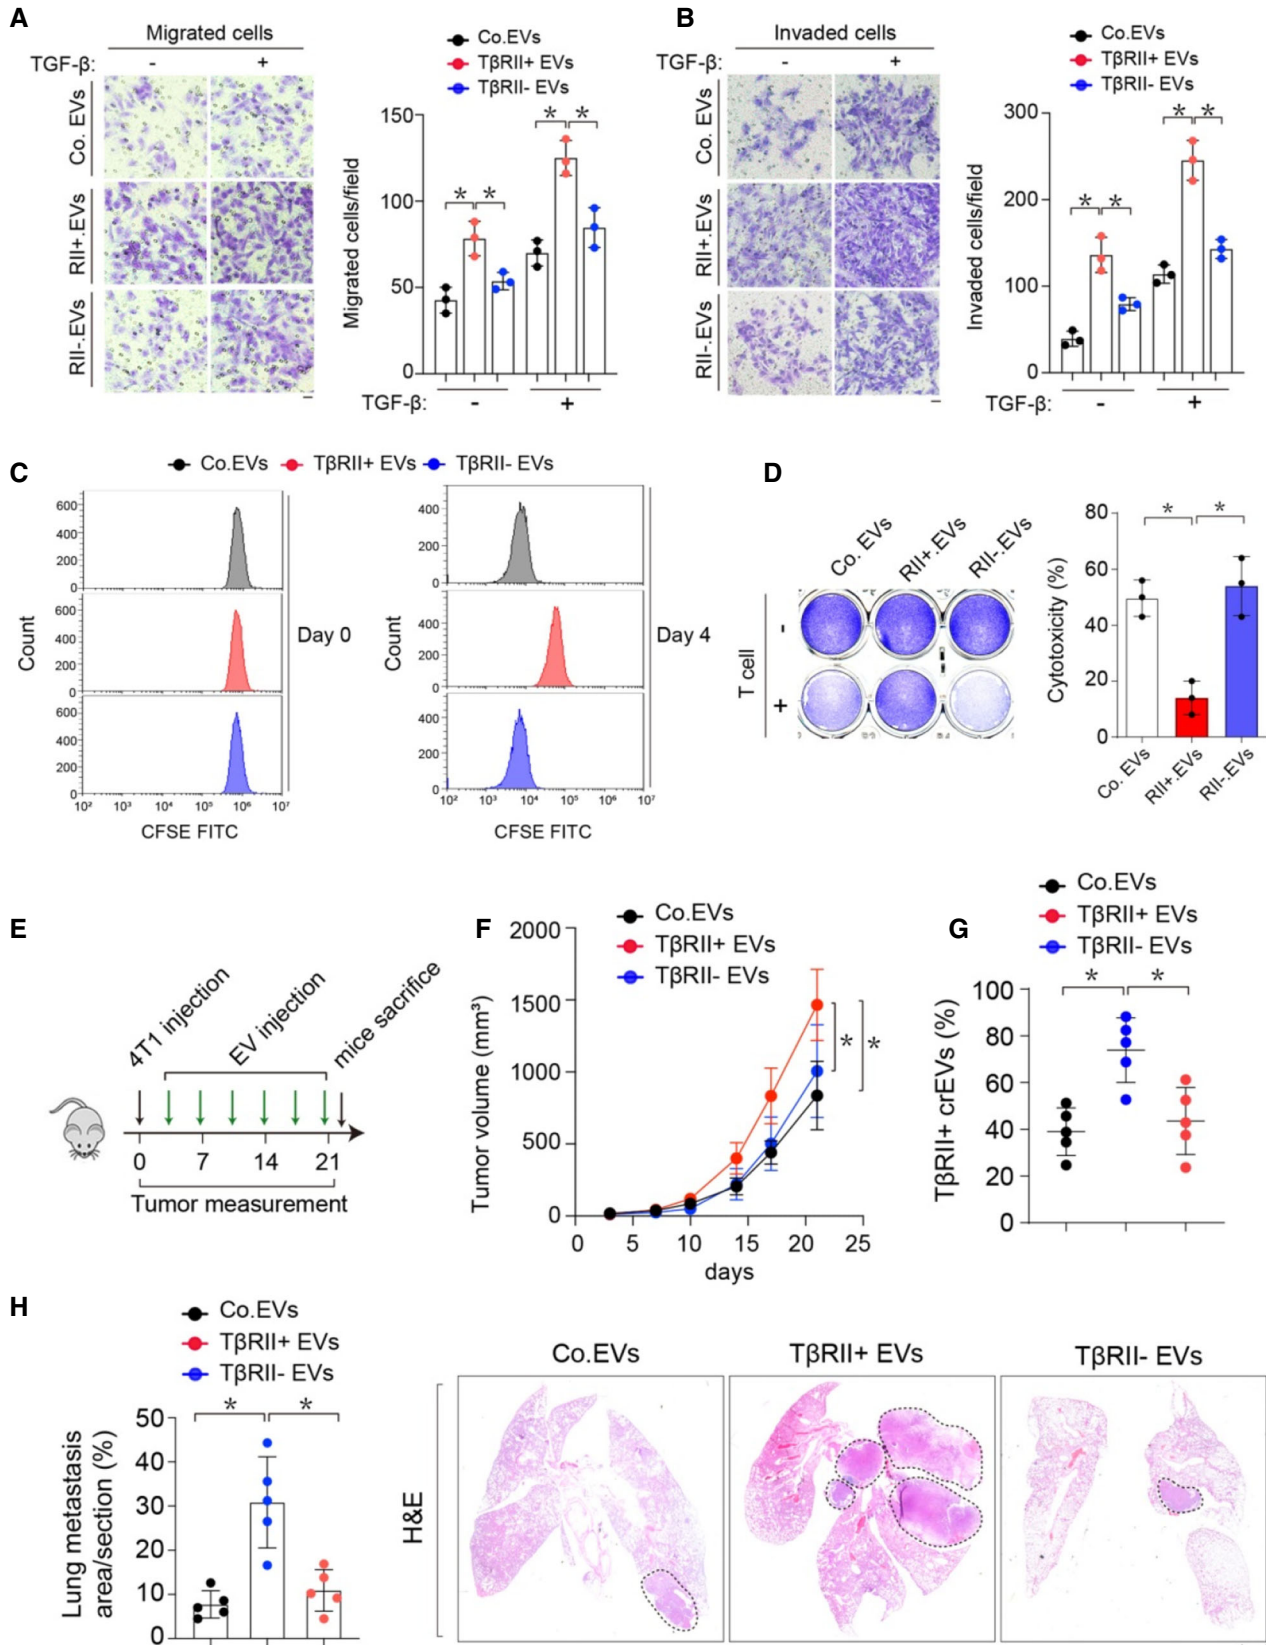

Fig EV4.
