# Supplementary material
Source: PubMed Central journal article supplement (PMC9379553)
Supplement: EMBJ-41-e108791-s006.pdf [file EMBJ-41-e108791-s006.pdf]

## Appendix

### USP8 promotes cancer progression and extracellular vesicle-mediated CD8+ T cell exhaustion by deubiquitinating the TGF- $\beta$ receptor T $\beta$ RII

Feng Xie<sup>1</sup>\*, Xiaoxue Zhou<sup>2</sup>\*, Heyu Li<sup>2</sup>, Peng Su<sup>2</sup>, Sijia Liu<sup>3</sup>, Ran Li<sup>4</sup>, Jing Zou<sup>2</sup>, Xiang Wei<sup>2</sup>, Chen Pan<sup>2</sup>, Zhengkui Zhang<sup>1</sup>, Min Zheng<sup>5</sup>, Zhuang Liu<sup>6</sup>, Xuli Meng<sup>7</sup>, Huib Ovaa<sup>3</sup>†, Peter ten Dijke<sup>3</sup>¶, Fangfang Zhou<sup>1</sup>¶, Long Zhang<sup>2</sup>¶

#### Table of Content

- **Appendix Figure S1.** USP8 promotes TGF- $\beta$  downstream signals and EMT.....**Page 2**
- **Appendix Figure S2.** USP8 correlates with T $\beta$ RII in human specimens.....**Page 3**
- **Appendix Figure S3.** T $\beta$ RII levels are specifically enhanced by the inducible USP8-wt in the metastatic tumor cells.....**Page 4**
- **Appendix Figure S4.** Pharmacological inhibition of USP8 improves breast cancer immunotherapy.....**Page 5**
- **Appendix Figure S5.** USP8 inhibitor impairs tumor growth in immunocompromised mice.....**Page 6**
- **Appendix Table S1.** Gene signatures microarray correlated with USP8 expression in a comparison of breast cancer patients.....**Page 7-18**
- **Appendix Table S2.** Heatmap of TGF- $\beta$  target genes by qRT-PCR analysis.....**Page 19**
- **Appendix Table S3.** Primers list.....**Page 20-21**

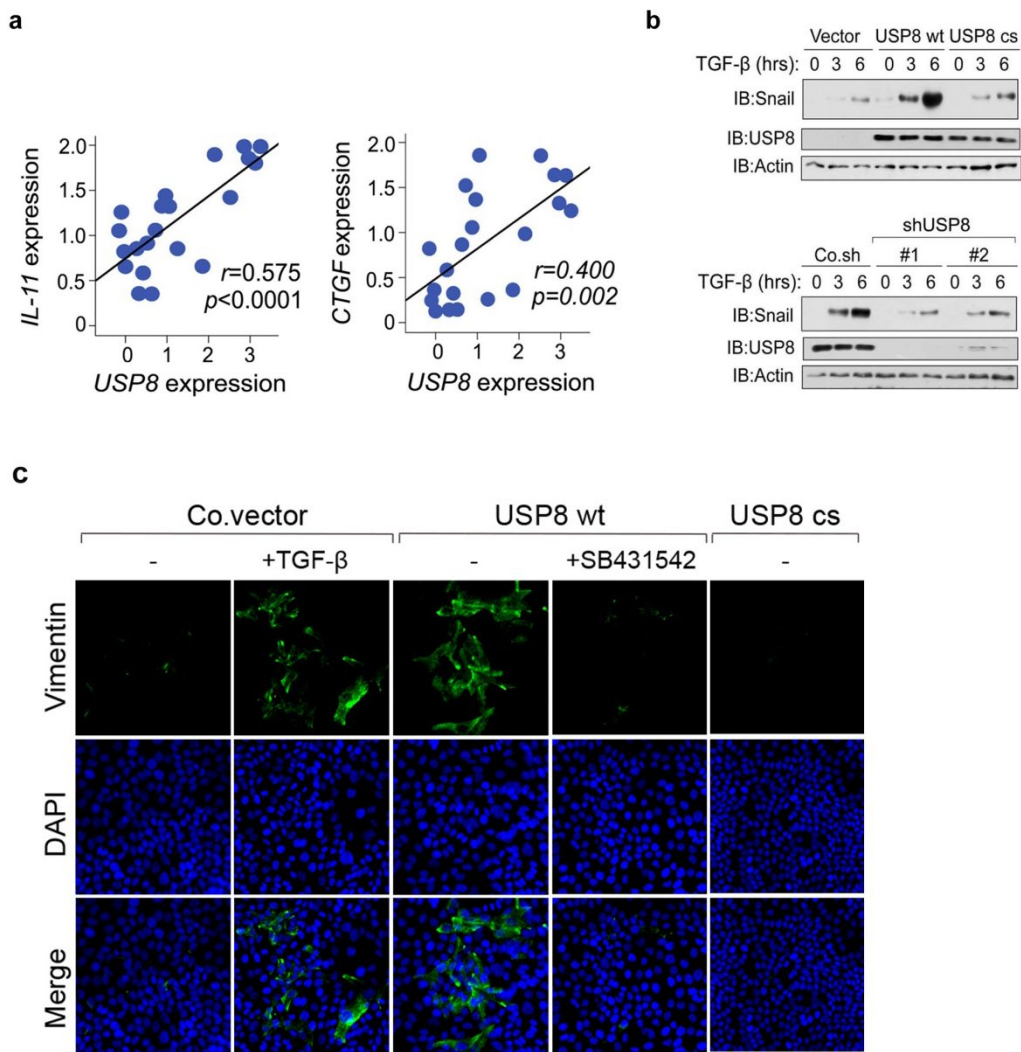

**Appendix Figure S1. USP8 promotes TGF- $\beta$  downstream signals and EMT.**

**a**, *Ex vivo* qRT-PCR analysis of correlation between *USP8* and *IL-11* or *CTGF* expression in the cells isolated from the metastatic nodules. This is related to results shown in Figure 2c. p values from Pearson correlation test were indicated.

**b**, IB of cell lysate from control and parental MDA-MB-231 cells ectopic expressed USP8-wt/cs (upper panel) or depleted of USP8 with two independent shRNA (lower panel) and treated with TGF- $\beta$  (5 ng/ml) as indicated time points.

**c**, Immunofluorescence and 4, 6-diamidino-2-phenylindole (DAPI) staining of HaCaT cells infected with control or USP8 wt/cs and treated with TGF- $\beta$  (2.5 ng/ml) and SB431542 (10  $\mu$ M) for 72 hrs. Scale bar, 20  $\mu$ m.

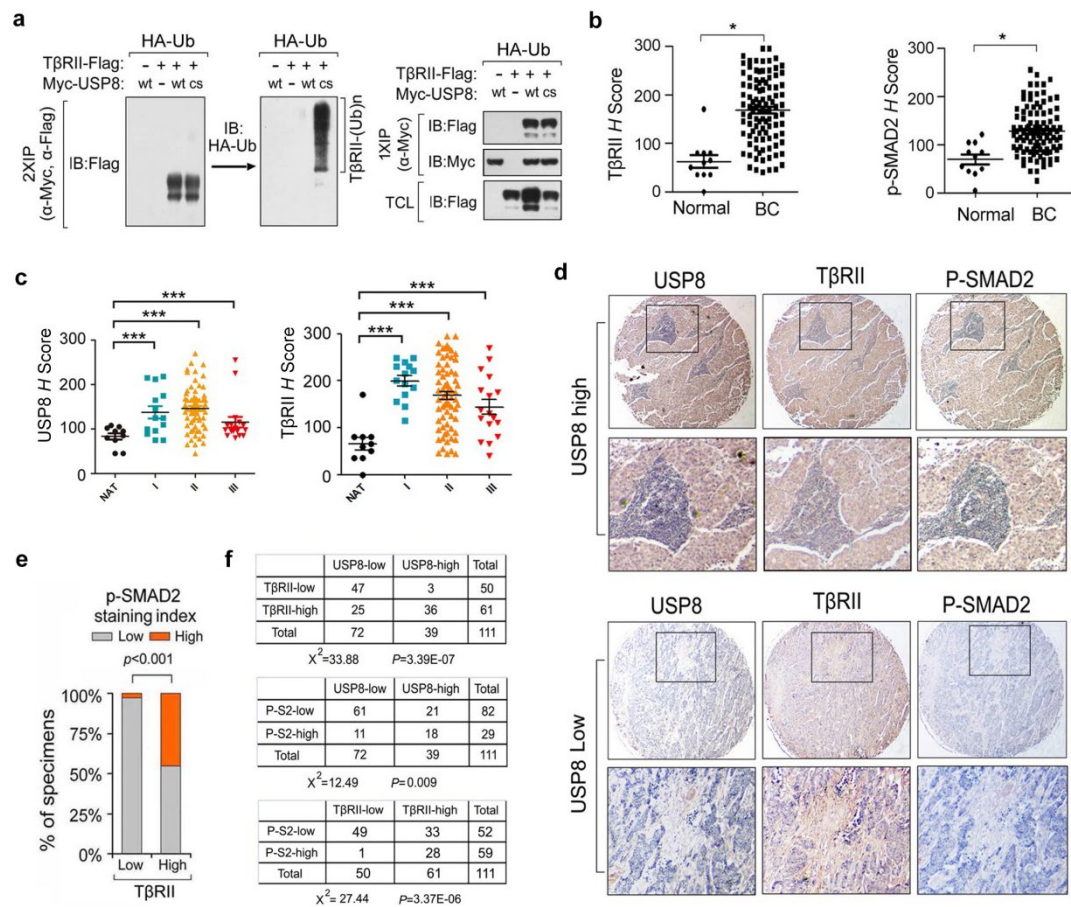

## Appendix Figure S2. USP8 correlates with TβRII in human specimens.

**a**, IB of total cell lysate (TCL) and immunoprecipitates (two times immunoprecipitation: first with anti-Myc antibody and the precipitant was denatured in 2% SDS and diluted 20 times then followed with anti-Flag antibody) derived from HA-Ub stably expressed HEK293T cells transfected with indicated plasmids.

**b**, Expression of TβRII and p-SMAD2 of normal tissues (n = 11) and breast cancer patients (n = 110). H score of every tissue samples of TβRII and p-SMAD2 was calculated. p values from Student's t tests were indicated.

**c**, Expression of USP8 and TβRII of normal tissues (n = 11) and breast cancer patients (n = 110) at different malignant stage (I-III). H score of every tissue samples of USP8 and TβRII were calculated. p values from Student's t tests were indicated.

**d**, Immunohistochemistry analysis of USP8, TβRII and p-SMAD2 in breast cancer tissue microarrays.

**e**, Percentage of specimens displaying low or high TβRII level compared to the expression levels of p-SMAD2. p values from Student's t tests were indicated.

**f**, Case number of specimens showing low or high TβRII, p-SMAD2 (P-S2) expression in relation to the expression levels of USP8.

\* $p < 0.05$ , \*\*\*  $p < 0.001$ , Data are shown as means  $\pm$  SD (**b**, **c**).

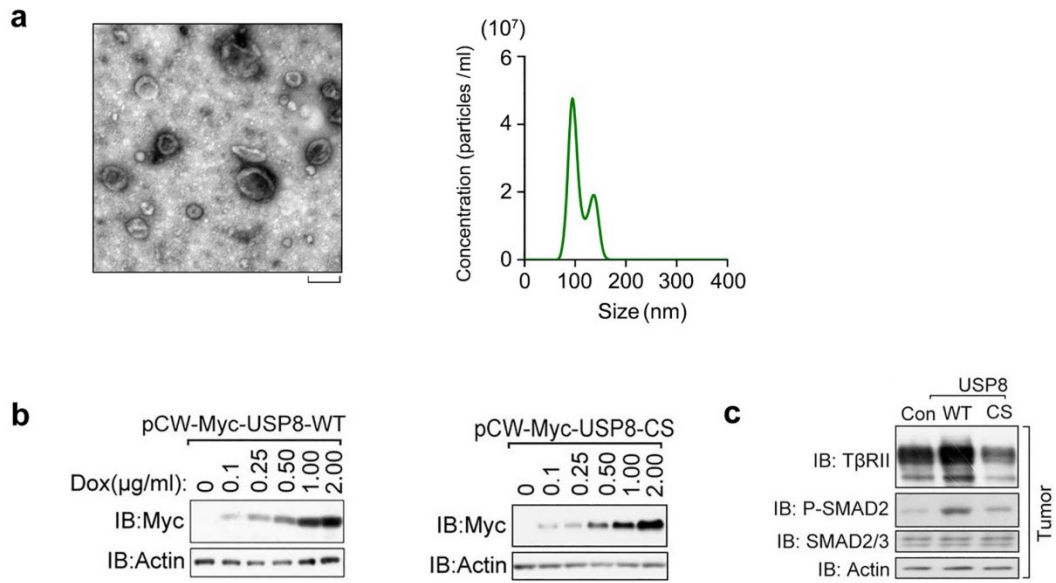

**Appendix Figure S3. T $\beta$ RII levels are specifically enhanced by the inducible USP8-wt in the metastatic tumor cells.**

**a**, A representative TEM image of purified EVs from the plasma of breast cancer patients (left), and nanoparticle tracking of purified EVs (right). Scale bar (left panel), 100 nm.

**b**, Immunoblot analysis showing Dox inducible expression of Myc-USP8 WT/CS in 4T07-Luc cells.

**c**, Immunoblot analysis of metastatic tumor cells, related to Figure 4i.

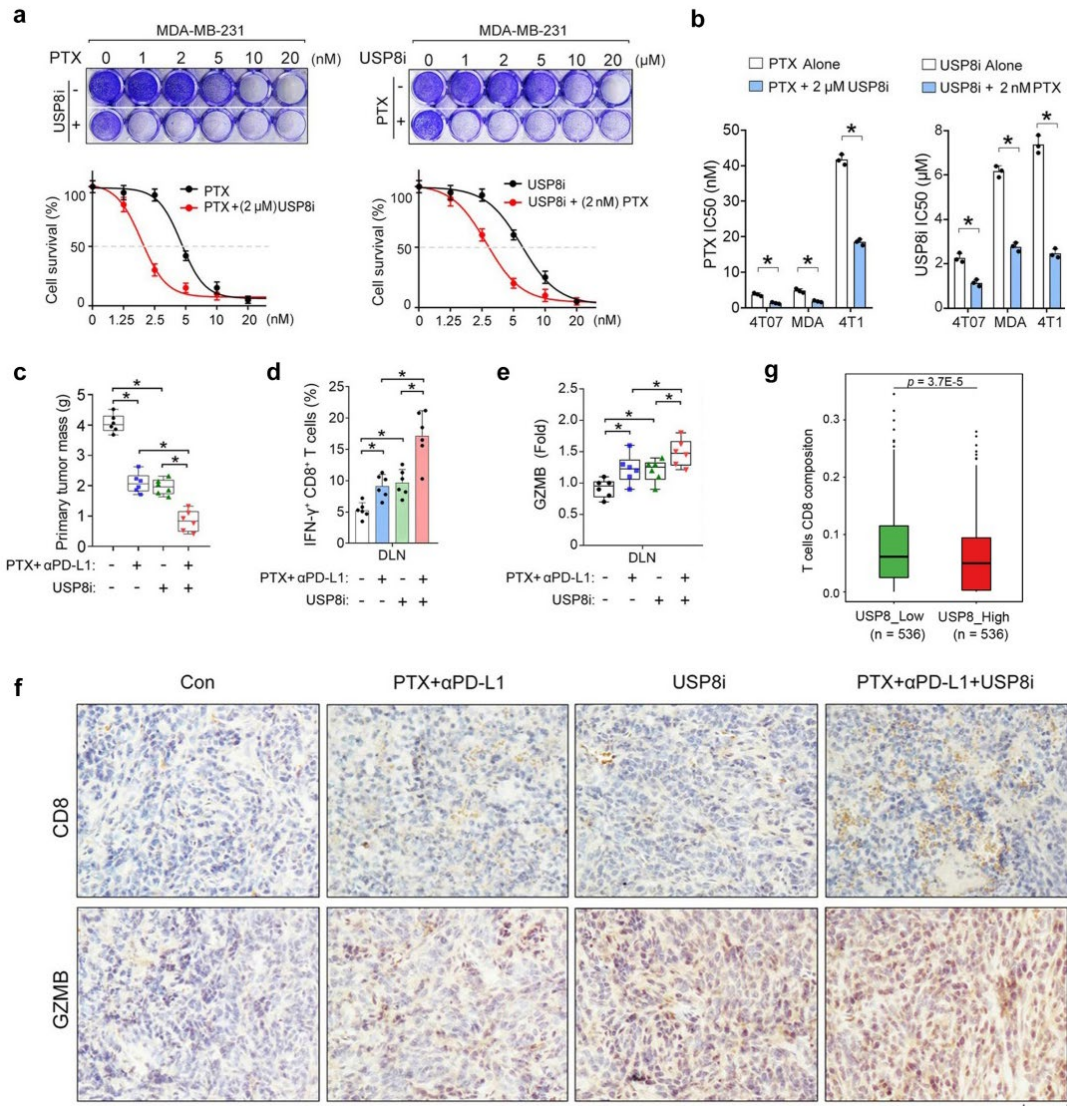

### Appendix Figure S4. Pharmacological inhibition of USP8 improves breast cancer immunotherapy.

**a**, MTT assay to measure the drug resistance of combined use of PTX and USP8 inhibitor with increasing amount of concentration as indicated. Cytotoxic crystal violet staining (upper panel) and quantification of the cell survival (bottom panel) are shown.

**b**, IC<sub>50</sub> of PTX with combined use of USP8 inhibitor (2 μM) (left) and the IC<sub>50</sub> of USP8 inhibitor with combined use of PTX (2 nM) (right) in 4T07, MDA-MB-231 (MDA) cells and 4T1 cells by MTT assay. p values from Student's t tests were indicated.

**c-e**, Quantification of the mass of primary tumor in each group ( $n = 6$ ) (**c**). Quantification of the percentage of IFN $\gamma^+$  cells among the CD8 $^+$  T cells populations from DLN (**d**). Fold change relative to the control of CD8 $^+$  T cell GZMB mean fluorescence intensity by flow cytometry (**e**). p values from Student's t tests were indicated. Box-and-whisker plots, boxes show 25-75th percentile, lines show median, and whiskers show range of data point.

**f**, Representative images of CD8 (upper panel) and GZMB (lower panel) by immunohistochemistry at day 35 in the primary tumor. Scale bars, 50 μm.



g. Infiltration of breast cancer tumors by immune cell population (CD8<sup>+</sup> T cells) was further analyzed by CIBERSORT, a method for characterizing the cell composition of complex tissues on the basis of their gene expression profiles (n = 1072). Gene expression data (RPKM) were obtained from TCGA. p values from Student's t tests were indicated. The box-and-whisker plots represent the medians (middle line), first quartiles (lower bound line), third quartiles (upper bound line), and the  $\pm 1.5\times$  interquartile ranges (whisker lines).

\* $p < 0.05$ . Data are shown as mean + SD (b, d) or as means  $\pm$  SD (a, c, e).

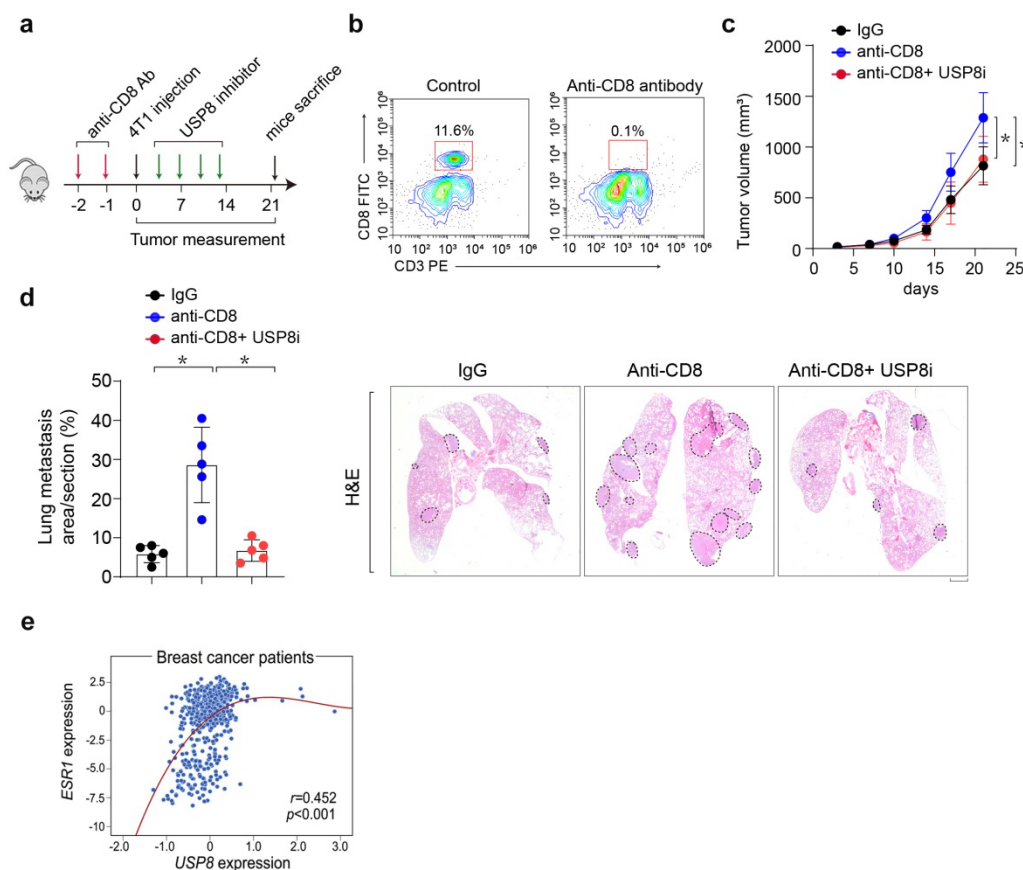

### Appendix Figure S5. USP8 inhibitor impairs tumor growth in immunocompromised mice.

**a-d**, Experimental analysis *in vivo*: BALB/c mice were intraperitoneally injected with anti-CD8 antibody (100  $\mu$ g per mouse) for two days before 4T1-luc cells nipple inoculation ( $2 \times 10^5$  cells per mouse), followed by intraperitoneal-injection of USP8 inhibitor (1 mg/kg) (n = 5 per group) (**a**). FACS analysis of the percentage of CD8<sup>+</sup> T cells in plasma samples from mice at week 3 (**b**). Tumor volume measurement of mice from each group at the indicated times (**c**). Tumor metastases area per HE stained lung section and representative HE stained lung sections from each group at week 3. Scale bar, 1 mm (**d**).

**e**. Correlation between USP8 and ESR1 expression in breast cancer patients (n = 522).

\* $p < 0.05$  (two-tailed Student's t test (**d**) or two-way ANOVA (**c**)). Data are shown as mean  $\pm$  SD (**c**, **d**).

**Appendix Table S1. Gene signatures microarray correlated with USP8 expression**

**in a comparison of breast cancer patients with USP8-high (n = 38) versus with USP8-low (n = 39)**

| Gene     | USP8 low patients (n=39) |             |             |             |             |             |             |             |             |             |             |             |
|----------|--------------------------|-------------|-------------|-------------|-------------|-------------|-------------|-------------|-------------|-------------|-------------|-------------|
|          | Sample. 123              | Sample .125 | Sample .126 | Sample .133 | Sample. 146 | Sample. 147 | Sample .148 | Sample. 157 | Sample. 167 | Sample .169 | Sample .176 | Sample. 178 |
| ABCC3    | 0.028                    | 0.059       | -0.008      | -0.014      | -0.198      | -0.001      | -0.065      | -0.071      | 0.017       | 0.169       | -0.126      | -0.002      |
| ACAT1    | 0.022                    | 0.128       | -0.076      | 0.269       | 0.312       | 0.055       | 0.043       | -0.009      | 0.195       | 0.26        | -0.051      | 0.059       |
| ACYP1    | 0.229                    | 0.227       | 0.202       | 0.108       | 0.495       | 0.227       | 0.368       | 0.169       | 0.194       | 0.16        | 0.142       | 0.212       |
| ASPH     | 0.005                    | -0.201      | -0.005      | -0.116      | -0.19       | 0.047       | 0.054       | -0.223      | -0.004      | -0.111      | -0.081      | 0.053       |
| BLCAP    | 0.061                    | -0.067      | -0.023      | 0.017       | 0.082       | -0.063      | 0.079       | -0.044      | 0.024       | -0.157      | -0.006      | 0.044       |
| CCT6A    | 0.136                    | 0.134       | 0.172       | 0.116       | 0.238       | 0.258       | 0.209       | 0.095       | 0.165       | 0.184       | 0.366       | 0.205       |
| CCT8     | 0.126                    | 0.022       | -0.022      | 0.05        | 0.211       | 0.1         | 0.038       | 0.011       | 0.096       | 0.081       | -0.042      | 0.21        |
| CEBPG    | 0.111                    | -0.022      | 0.141       | 0.017       | 0.241       | 0.329       | 0.092       | 0.026       | 0.118       | 0.056       | 0.171       | 0.06        |
| CLCN3    | -0.108                   | -0.216      | -0.112      | -0.193      | 0.028       | -0.206      | 0.224       | -0.189      | -0.036      | -0.09       | -0.096      | 0.017       |
| CLNS1A   | -0.073                   | -0.103      | -0.089      | -0.116      | 0.003       | 0           | -0.052      | -0.214      | -0.039      | -0.091      | -0.161      | 0.217       |
| COL4A5   | 0.209                    | 0.075       | 0.238       | 0.106       | 0.458       | 0.055       | -0.005      | 0.102       | 0.348       | -0.107      | -0.094      | 0.354       |
| CPNE2    | 0.274                    | -0.037      | 0.069       | 0.137       | 0.252       | 0.369       | 0.301       | 0.069       | 0.153       | -0.193      | 0.054       | 0.228       |
| CSRP1    | -0.059                   | -0.207      | -0.041      | 0.005       | -0.089      | -0.024      | 0.033       | -0.216      | 0.066       | 0.173       | -0.05       | 0.162       |
| CTNND1   | 0.133                    | 0.117       | 0.158       | 0.107       | 0.205       | 0.175       | 0.11        | -0.047      | 0.205       | -0.008      | 0.101       | 0.181       |
| CTNND1   | 0.101                    | 0.075       | 0.044       | 0.082       | 0.088       | 0.06        | 0.112       | -0.09       | 0.181       | 0.001       | 0.077       | 0.216       |
| CTNND1   | 0.133                    | 0.117       | 0.158       | 0.107       | 0.205       | 0.175       | 0.11        | -0.047      | 0.205       | -0.008      | 0.101       | 0.181       |
| CTNND1   | 0.101                    | 0.075       | 0.044       | 0.082       | 0.088       | 0.06        | 0.112       | -0.09       | 0.181       | 0.001       | 0.077       | 0.216       |
| DAG1     | 0.175                    | 0.113       | 0.213       | 0.163       | 0.298       | 0.251       | 0.25        | 0.132       | 0.221       | 0.144       | 0.046       | 0.237       |
| DUSP6    | 0.263                    | 0.117       | 0.093       | 0.155       | -0.024      | 0.318       | 0.137       | 0.039       | 0.277       | 0.427       | 0.204       | 0.385       |
| EIF5     | 0.256                    | 0.242       | 0.232       | 0.185       | 0.251       | 0.41        | 0.27        | 0.164       | 0.243       | 0.166       | 0.077       | 0.226       |
| ENSA     | 0.051                    | -0.016      | 0.048       | -0.031      | 0.059       | 0.039       | -0.163      | -0.096      | 0.137       | 0.213       | -0.068      | 0.051       |
| FBXO3    | -0.023                   | -0.041      | -0.049      | -0.047      | 0.101       | 0.101       | 0.152       | -0.073      | 0.066       | 0.029       | 0.01        | 0.079       |
| FEZ2     | -0.028                   | -0.064      | -0.1        | 0.002       | 0.004       | 0.029       | 0           | -0.114      | 0.083       | 0.034       | 0.007       | 0.062       |
| FLRT2    | 0.099                    | 0.004       | -0.089      | 0.085       | -0.034      | -0.024      | -0.084      | -0.113      | 0.185       | -0.304      | 0.202       | 0.122       |
| G6PD     | -0.112                   | -0.14       | -0.033      | -0.075      | -0.091      | -0.035      | -0.084      | -0.137      | -0.1        | -0.152      | -0.135      | -0.098      |
| GADD45A  | 0.056                    | 0.046       | -0.067      | 0.123       | 0.161       | 0.21        | 0.056       | 0.263       | 0.237       | 0.099       | 0.19        | 0.276       |
| GCSH     | 0.173                    | 0.149       | 0.252       | 0.17        | 0.335       | 0.283       | 0.391       | 0.163       | 0.243       | 0.063       | 0.283       | 0.144       |
| GLRX     | 0.061                    | 0.154       | 0.04        | 0.221       | 0.18        | 0.107       | -0.043      | 0.147       | 0.051       | 0.18        | -0.165      | -0.12       |
| HSD17B7  | 0.097                    | 0.096       | 0.11        | 0.127       | 0.148       | -0.092      | 0.093       | 0.166       | 0.101       | 0.166       | 0.04        | 0.083       |
| IKBKAP   | 0.321                    | 0.264       | 0.307       | 0.253       | 0.362       | 0.421       | 0.339       | 0.278       | 0.304       | 0.196       | 0.188       | 0.268       |
| IP6K2    | 0.16                     | 0.246       | 0.239       | 0.222       | 0.419       | 0.169       | 0.369       | 0.295       | 0.312       | 0.057       | 0.138       | 0.221       |
| KCNS3    | 0.226                    | 0.118       | -0.012      | 0.375       | 0.604       | 0.389       | 0.143       | 0.107       | 0.36        | 0.037       | -0.068      | 0.194       |
| LSM5     | 0.145                    | 0.08        | 0.078       | 0.031       | 0.124       | 0.067       | -0.018      | 0.005       | 0.044       | 0.202       | 0.058       | 0.027       |
| MAD2L1   | -0.202                   | -0.207      | 0           | -0.195      | 0.025       | 0.095       | -0.007      | -0.155      | -0.035      | -0.144      | -0.085      | -0.193      |
| MADD     | 0.069                    | -0.022      | 0.036       | 0.001       | 0.03        | 0.013       | 0.153       | -0.119      | -0.031      | -0.054      | -0.056      | -0.023      |
| MAN2C1   | -0.011                   | -0.007      | -0.085      | -0.054      | 0.147       | 0.066       | 0.151       | -0.105      | 0.021       | -0.016      | 0.014       | 0.05        |
| MAPKAPK5 | 0.036                    | -0.065      | 0.028       | 0.022       | 0.121       | 0.11        | -0.024      | -0.107      | 0.072       | 0.02        | -0.021      | -0.003      |
| MFAP1    | 0.055                    | 0.066       | 0.112       | -0.021      | 0.175       | 0.069       | 0.172       | -0.002      | 0.037       | -0.012      | -0.021      | 0.025       |
| MNT      | 0.147                    | 0.014       | 0.044       | 0.094       | 0.131       | 0.111       | 0.128       | 0.042       | 0.2         | 0.099       | 0.083       | 0.198       |
| MTX2     | 0.128                    | 0.081       | 0.144       | 0.133       | 0.276       | 0.154       | 0.215       | 0.135       | 0.183       | 0.263       | 0.214       | 0.097       |
| NFKB1    | 0.09                     | 0.049       | -0.007      | 0.051       | 0.08        | 0.084       | 0.051       | -0.068      | 0.124       | 0.054       | -0.037      | 0.059       |
| OGG1     | 0.003                    | 0.057       | 0.073       | 0.099       | 0.139       | 0.176       | 0.135       | 0.079       | 0.104       | 0.044       | -0.05       | 0.07        |
| OXR1     | 0.072                    | 0.059       | -0.019      | -0.001      | 0.038       | 0.027       | -0.003      | -0.079      | 0.025       | -0.022      | 0.028       | 0.035       |
| PAN2     | 0.049                    | 0.04        | 0.031       | 0.065       | 0.194       | 0.143       | 0.087       | 0.005       | 0.091       | 0.03        | 0.019       | 0.046       |
| PCM1     | -0.051                   | 0.065       | -0.039      | -0.195      | -0.113      | -0.1        | -0.156      | 0.002       | 0.091       | 0.053       | -0.127      | -0.088      |
| PDHB     | 0.227                    | 0.312       | 0.192       | 0.272       | 0.365       | 0.366       | 0.304       | 0.321       | 0.239       | 0.112       | -0.11       | 0.211       |
| PIGB     | 0.109                    | 0.118       | 0.06        | 0.049       | 0.309       | 0.162       | 0.08        | 0.068       | 0.22        | 0.231       | 0.124       | 0.106       |

|         |        |        |        |        |        |        |        |        |        |        |        |        |
|---------|--------|--------|--------|--------|--------|--------|--------|--------|--------|--------|--------|--------|
| PLAT    | 0.614  | 0.072  | 0.753  | 0.495  | 0.463  | 0.399  | 0.781  | 0.241  | 0.531  | -0.076 | 0.096  | 1.055  |
| POLD4   | 0.045  | 0.099  | 0.112  | 0.075  | 0.081  | 0.088  | 0.006  | 0.032  | -0.013 | 0.102  | -0.045 | -0.038 |
| POLI    | -0.194 | -0.004 | -0.017 | -0.081 | 0.149  | -0.067 | 0.069  | -0.027 | -0.114 | -0.089 | -0.071 | -0.119 |
| POLR2G  | 0.11   | 0.052  | 0.151  | 0.079  | 0.138  | 0.296  | 0.118  | 0.129  | 0.091  | 0.106  | 0.077  | 0.052  |
| PPL     | 0.059  | 0.111  | 0.033  | 0.079  | 0.027  | 0.241  | 0.033  | 0.095  | 0.186  | 0.131  | -0.115 | 0.253  |
| PPP2CB  | -0.012 | -0.007 | -0.033 | -0.055 | 0.051  | 0.102  | 0.013  | -0.1   | 0.022  | -0.035 | -0.066 | -0.01  |
| PRKAR1A | 0.25   | 0.059  | 0.288  | 0.079  | 0.278  | 0.206  | 0.388  | 0.102  | 0.287  | 0.201  | 0.237  | 0.333  |
| PRPS2   | 0.268  | 0.2    | 0.142  | 0.353  | 0.467  | 0.279  | 0.214  | 0.045  | 0.339  | 0.41   | 0.155  | 0.305  |
| PSMD9   | 0.207  | 0.168  | 0.215  | 0.126  | 0.312  | 0.241  | 0.166  | 0.093  | 0.21   | 0.242  | 0.167  | 0.258  |
| PSME3   | 0.041  | -0.025 | 0.053  | 0.031  | 0.309  | 0.13   | 0.07   | 0.034  | 0.123  | -0.05  | -0.066 | 0.029  |
| QDPR    | 0.392  | 0.379  | 0.305  | 0.414  | 0.963  | 0.357  | 0.323  | 0.419  | 0.646  | 0.649  | 0.207  | 0.33   |
| RABGGTA | 0.035  | -0.058 | 0.088  | -0.012 | 0.155  | 0.108  | 0.118  | -0.024 | 0.021  | -0.081 | -0.045 | 0.016  |
| RALGDS  | -0.074 | -0.086 | -0.016 | -0.042 | 0.04   | 0.043  | 0.235  | -0.264 | -0.061 | -0.304 | -0.24  | -0.033 |
| RBM6    | -0.061 | 0.04   | 0.04   | -0.08  | -0.056 | -0.105 | -0.007 | -0.048 | 0.018  | -0.233 | -0.256 | -0.09  |
| RGS5    | 0.126  | -0.102 | -0.139 | -0.008 | 0.014  | -0.058 | 0.2    | -0.024 | 0.167  | -0.014 | 0.017  | 0.218  |
| RNASE4  | -0.071 | -0.108 | -0.225 | -0.08  | 0.073  | -0.129 | -0.174 | -0.181 | 0.011  | -0.15  | -0.133 | -0.122 |
| RNF2    | 0.219  | 0.213  | 0.067  | 0.093  | 0.143  | 0.019  | 0.161  | 0.167  | 0.256  | 0.093  | 0.206  | 0.242  |
| RNF4    | 0.156  | 0.102  | 0.192  | 0.137  | 0.292  | 0.254  | 0.213  | 0.15   | 0.177  | 0.081  | 0.098  | 0.147  |
| RNF6    | -0.005 | -0.018 | 0.018  | -0.129 | 0.018  | 0.026  | -0.018 | -0.119 | -0.007 | -0.075 | -0.105 | -0.077 |
| RPL30   | -0.067 | -0.018 | -0.066 | -0.097 | 0.178  | 0.072  | -0.015 | -0.073 | 0.021  | 0.045  | -0.123 | -0.103 |
| RPL6    | -0.042 | -0.036 | 0.021  | -0.124 | 0.049  | 0.007  | 0.124  | -0.039 | 0.069  | 0.022  | -0.076 | 0.009  |
| SLC2A1  | -0.061 | 0.092  | 0.257  | -0.065 | 0.191  | 0.202  | 0.485  | -0.028 | -0.038 | -0.211 | -0.205 | -0.134 |
| SON     | 0.065  | 0.017  | -0.003 | -0.061 | 0.006  | 0.035  | 0.116  | -0.042 | 0.02   | -0.123 | -0.284 | 0.002  |
| STAT3   | 0.057  | -0.061 | -0.127 | 0.133  | 0.047  | -0.03  | -0.135 | 0.03   | 0.086  | -0.122 | -0.139 | 0.038  |
| TANK    | 0.071  | -0.002 | 0.052  | 0.02   | 0.085  | 0.118  | 0.066  | -0.045 | 0.092  | 0.18   | 0.124  | 0.137  |
| TARS    | -0.026 | -0.017 | 0.056  | -0.031 | 0.095  | 0.175  | 0.106  | 0.048  | 0.044  | -0.093 | 0.054  | 0.03   |
| TIMM9   | -0.045 | -0.085 | -0.12  | -0.092 | 0.033  | -0.132 | -0.088 | -0.097 | 0.07   | -0.039 | -0.189 | -0.032 |
| TNFAIP1 | 0.093  | -0.057 | -0.061 | 0.097  | 0.099  | 0.343  | 0.238  | 0.016  | 0.004  | -0.077 | -0.097 | 0.001  |
| TSG101  | -0.055 | -0.05  | -0.007 | -0.011 | 0.123  | 0.049  | 0.127  | -0.056 | -0.024 | 0.01   | -0.034 | 0.032  |
| TUFT1   | 0.141  | -0.155 | 0.181  | 0.215  | 0.218  | -0.002 | -0.046 | 0.159  | 0.174  | 0.075  | 0.087  | 0.193  |
| USP8    | -0.047 | -0.033 | -0.005 | -0.081 | 0.016  | -0.047 | 0.136  | -0.081 | -0.004 | -0.087 | -0.049 | -0.021 |
| WRB     | 0.076  | -0.043 | -0.007 | -0.03  | 0.022  | -0.007 | 0.131  | 0.085  | 0.142  | 0.198  | 0.116  | 0.084  |
| ZNF140  | 0.114  | 0.157  | 0.118  | 0.175  | 0.023  | 0.143  | 0.149  | 0.049  | 0.102  | 0.017  | 0.126  | 0.112  |
| ZNF263  | 0.147  | 0.264  | 0.21   | 0.194  | 0.328  | 0.109  | 0.308  | 0.257  | 0.284  | 0.262  | 0.182  | 0.169  |
| ZNF282  | 0.145  | -0.002 | 0.131  | 0.09   | 0.137  | 0.186  | 0.2    | 0.233  | 0.171  | -0.005 | 0.188  | 0.18   |
| ZNF32   | 0.139  | 0.219  | 0.172  | 0.175  | 0.284  | 0.256  | 0.084  | 0.188  | 0.197  | 0.238  | 0.115  | 0.168  |



| USP8 low patients (n=39) |                |                |                |                 |                |                |                |                |                |                |                |                |
|--------------------------|----------------|----------------|----------------|-----------------|----------------|----------------|----------------|----------------|----------------|----------------|----------------|----------------|
| Sample.<br>256           | Sample.<br>261 | Sample.<br>267 | Sample.<br>274 | Sample.<br>.280 | Sample.<br>283 | Sample.<br>290 | Sample.<br>293 | Sample<br>.319 | Sample.<br>323 | Sample.<br>329 | Sample.<br>334 | Sample.<br>342 |
| -0.19                    | 0.109          | -0.178         | -0.125         | -0.098          | -0.153         | 0.191          | 0.134          | -0.247         | 0.085          | -0.07          | -0.147         | -0.079         |
| 0.04                     | 0.038          | -0.022         | 0.171          | 0.133           | 0.174          | 0.267          | 0.181          | 0.123          | -0.016         | 0.019          | 0.245          | -0.008         |
| 0.46                     | 0.234          | 0.152          | 0.117          | 0.253           | 0.631          | 0.242          | 0.5            | 0.327          | 0.268          | 0.319          | 0.383          | 0.6            |
| -0.069                   | -0.007         | -0.115         | -0.074         | 0.056           | 0.002          | -0.099         | -0.378         | -0.081         | -0.215         | -0.221         | -0.174         | 0.08           |
| -0.094                   | -0.063         | -0.008         | -0.007         | 0.088           | -0.014         | -0.078         | -0.136         | -0.03          | 0.023          | -0.061         | -0.029         | 0.085          |
| -0.127                   | 0.11           | 0.175          | 0.082          | 0.167           | 0.246          | 0.16           | 0.132          | 0.287          | 0.123          | 0.23           | 0.228          | 0.222          |
| -0.074                   | 0.051          | 0.059          | -0.084         | 0.049           | -0.052         | 0.158          | 0.05           | 0.146          | 0.105          | 0.129          | 0.123          | 0.134          |
| -0.108                   | 0.028          | 0.147          | 0.078          | 0.068           | 0.13           | 0.128          | 0.124          | 0.197          | -0.101         | 0.19           | 0.116          | 0.216          |
| -0.266                   | -0.116         | -0.255         | -0.182         | -0.142          | -0.273         | -0.097         | -0.105         | -0.261         | -0.169         | -0.025         | 0.121          | 0.104          |
| -0.235                   | -0.018         | -0.15          | -0.207         | -0.095          | -0.061         | -0.1           | -0.034         | 0.13           | -0.069         | 0.12           | -0.026         | 0.152          |
| 0.247                    | 0.134          | -0.071         | 0.287          | 0.235           | 0.525          | 0.103          | -0.145         | 0.277          | -0.118         | 0.215          | -0.01          | 0.028          |
| 0.221                    | 0.103          | 0.024          | -0.095         | 0.068           | -0.045         | -0.02          | -0.22          | 0.253          | 0.262          | 0.095          | 0.126          | 0.28           |
| -0.249                   | -0.06          | 0.025          | -0.22          | 0.019           | -0.198         | 0.044          | 0.065          | -0.01          | -0.048         | -0.084         | 0.023          | -0.02          |
| 0.193                    | 0.236          | -0.101         | 0.088          | 0.04            | 0.112          | 0.053          | -0.038         | 0.108          | 0.135          | -0.187         | 0.07           | 0.147          |
| 0.143                    | 0.078          | -0.057         | 0.041          | 0.075           | 0.102          | 0.001          | -0.1           | 0.166          | 0.128          | 0              | 0.049          | 0.069          |
| 0.193                    | 0.236          | -0.101         | 0.088          | 0.04            | 0.112          | 0.053          | -0.038         | 0.108          | 0.135          | -0.187         | 0.07           | 0.147          |
| 0.143                    | 0.078          | -0.057         | 0.041          | 0.075           | 0.102          | 0.001          | -0.1           | 0.166          | 0.128          | 0              | 0.049          | 0.069          |
| -0.044                   | 0.238          | 0.178          | 0.064          | 0.096           | 0.024          | 0.157          | -0.016         | 0.127          | 0.081          | 0.236          | 0.18           | 0.205          |
| -0.102                   | 0.354          | 0.182          | 0.108          | 0.117           | 0.187          | 0.378          | 0.1            | -0.07          | 0.028          | 0.127          | -0.101         | 0.111          |
| -0.021                   | 0.23           | 0.132          | 0.133          | 0.27            | 0.273          | 0.313          | 0.266          | 0.205          | 0.18           | 0.24           | 0.233          | 0.421          |
| -0.3                     | 0.046          | 0.064          | -0.03          | 0.016           | 0.029          | 0.222          | 0.257          | 0.006          | -0.095         | 0.138          | -0.034         | 0.196          |
| -0.325                   | -0.099         | -0.13          | -0.03          | 0.039           | -0.011         | 0.031          | 0.101          | 0.011          | 0.026          | -0.046         | 0.012          | 0.185          |
| -0.127                   | -0.076         | -0.088         | -0.02          | 0.006           | -0.036         | 0.012          | 0.007          | -0.063         | 0.031          | -0.056         | 0.018          | 0.029          |
| 0.094                    | 0.069          | -0.153         | 0.112          | 0.241           | 0.06           | -0.067         | -0.326         | -0.033         | 0.106          | -0.066         | 0.027          | 0.027          |
| -0.06                    | -0.003         | 0.149          | -0.151         | -0.065          | -0.158         | -0.12          | -0.224         | -0.148         | -0.202         | -0.195         | -0.087         | -0.07          |
| -0.15                    | 0.01           | 0.02           | -0.081         | 0.161           | 0.088          | 0.318          | 0.456          | 0.038          | 0.154          | 0.03           | 0.162          | 0.202          |
| 0.225                    | 0.094          | 0.232          | 0.257          | 0.246           | 0.27           | 0.226          | 0.208          | 0.259          | 0.279          | 0.344          | 0.446          | 0.269          |
| 0.019                    | 0.05           | 0.085          | 0.285          | 0.068           | 0.169          | 0.032          | 0.27           | 0.02           | 0.277          | -0.008         | 0.103          | 0.001          |
| 0.197                    | 0.002          | -0.191         | 0.122          | 0.177           | 0.184          | 0.136          | 0.266          | 0.122          | 0.063          | 0.267          | -0.046         | 0.166          |
| 0.258                    | 0.24           | 0.175          | 0.37           | 0.348           | 0.409          | 0.254          | 0.277          | 0.199          | 0.178          | 0.26           | 0.36           | 0.327          |
| 0.326                    | 0.266          | 0.167          | 0.03           | 0.169           | 0.386          | 0.116          | 0.15           | 0.351          | 0.377          | 0.322          | 0.405          | 0.434          |
| 0.171                    | 0.354          | 0.261          | 0.13           | 0.187           | 0.17           | 0.403          | 0.601          | 0.175          | 0.335          | 0.391          | 0.367          | 0.194          |
| -0.031                   | -0.098         | 0.092          | 0.137          | 0.09            | 0.225          | 0.204          | 0.235          | 0.371          | 0.225          | 0.265          | 0.101          | 0.159          |
| -0.362                   | -0.275         | -0.014         | -0.129         | -0.197          | 0.055          | -0.024         | 0.116          | 0.157          | -0.073         | 0.182          | -0.419         | 0.099          |
| 0.067                    | 0.025          | -0.14          | -0.048         | -0.061          | -0.038         | -0.042         | -0.117         | 0.065          | 0.017          | -0.061         | 0.107          | 0.056          |
| 0.265                    | 0.002          | -0.053         | -0.054         | -0.012          | 0.016          | -0.054         | -0.103         | 0.073          | -0.032         | 0.016          | 0.016          | 0.023          |
| -0.204                   | -0.019         | 0.006          | -0.008         | -0.001          | 0.055          | 0.098          | 0.027          | 0.101          | -0.075         | 0.033          | 0.083          | 0.014          |
| 0.071                    | 0.06           | -0.091         | -0.144         | 0.083           | -0.067         | 0.04           | -0.06          | 0              | 0.065          | 0              | 0.074          | 0.177          |
| -0.076                   | 0.15           | 0.04           | -0.05          | 0.104           | -0.062         | 0.149          | -0.108         | -0.004         | 0.031          | 0.122          | 0.178          | 0.121          |
| 0.195                    | 0.102          | 0.149          | 0.228          | 0.179           | 0.346          | 0.213          | 0.271          | 0.305          | 0.18           | 0.253          | 0.176          | 0.165          |
| 0.068                    | 0.17           | 0.004          | 0.027          | 0.062           | -0.055         | 0.114          | -0.092         | -0.026         | 0.146          | 0.068          | 0.048          | 0.07           |
| -0.171                   | 0.062          | 0.059          | 0.032          | 0.067           | 0.12           | 0.037          | 0.063          | 0.033          | 0.028          | 0.028          | 0.012          | 0.079          |
| 0.07                     | 0.109          | 0.13           | 0.096          | 0.03            | 0.253          | 0.041          | 0.039          | 0.106          | 0.046          | 0.106          | 0.005          | 0.237          |
| -0.028                   | 0.03           | 0.044          | 0.088          | 0.095           | 0.106          | 0.171          | 0.142          | 0.067          | 0.005          | 0.101          | 0.11           | 0.167          |
| -0.199                   | 0.098          | -0.23          | -0.001         | 0.043           | 0.071          | 0.008          | 0.019          | -0.218         | -0.071         | -0.393         | -0.022         | -0.071         |
| -0.007                   | 0.189          | 0.381          | 0.144          | 0.159           | 0.286          | 0.3            | 0.246          | 0.416          | 0.313          | 0.287          | 0.412          | 0.386          |
| -0.004                   | 0.29           | -0.009         | 0.065          | 0.171           | 0.136          | 0.189          | 0.176          | 0.146          | 0.01           | 0.108          | 0.182          | 0.113          |

|        |        |        |        |        |        |        |        |        |        |        |        |        |
|--------|--------|--------|--------|--------|--------|--------|--------|--------|--------|--------|--------|--------|
| 0.107  | 0.375  | 0.229  | 0.331  | 0.501  | 0.141  | 0.611  | 0.4    | 0.212  | 0.371  | 0.409  | 0.259  | 0.81   |
| 0.046  | 0.089  | 0.059  | 0.023  | -0.008 | -0.026 | 0.16   | -0.001 | -0.02  | 0.072  | 0.098  | 0.091  | 0.206  |
| 0.009  | 0.039  | -0.196 | 0.003  | 0.039  | 0.149  | 0.054  | -0.015 | 0.195  | 0.004  | -0.027 | 0.091  | -0.067 |
| 0.01   | 0.003  | -0.096 | 0.046  | 0.169  | 0.15   | 0.191  | 0.15   | 0.216  | 0.096  | 0.307  | 0.163  | 0.268  |
| -0.182 | 0.15   | 0.046  | -0.045 | 0.116  | -0.218 | 0.187  | -0.277 | -0.133 | 0.148  | -0.012 | 0.129  | 0.106  |
| -0.328 | 0.03   | -0.147 | -0.13  | -0.007 | -0.088 | 0.034  | -0.011 | -0.005 | -0.013 | -0.243 | 0.055  | 0.017  |
| 0.027  | 0.014  | 0.131  | 0.152  | 0.208  | 0.306  | 0.186  | 0.214  | 0.237  | 0.312  | 0.312  | 0.431  | 0.31   |
| 0.027  | 0.319  | 0.217  | 0.047  | 0.165  | 0.269  | 0.322  | 0.438  | 0.162  | 0.255  | 0.51   | 0.955  | 0.35   |
| -0.012 | 0.244  | 0.087  | 0.122  | 0.156  | 0.147  | 0.259  | 0.197  | 0.205  | 0.142  | 0.176  | 0.168  | 0.284  |
| -0.041 | 0.079  | -0.084 | -0.104 | -0.054 | -0.161 | 0.041  | -0.145 | -0.055 | -0.026 | -0.108 | 0.108  | 0.2    |
| 0.312  | 0.642  | 0.329  | 0.151  | 0.64   | 0.302  | 0.64   | 0.777  | 0.393  | 0.344  | 0.485  | 0.811  | 0.605  |
| -0.016 | 0.015  | 0.051  | -0.085 | -0.051 | -0.097 | -0.01  | -0.059 | 0.059  | -0.06  | 0.087  | 0.186  | 0.158  |
| 0.145  | 0.035  | -0.106 | -0.168 | -0.148 | -0.014 | -0.179 | -0.057 | 0.254  | 0.259  | 0.059  | 0.081  | 0.117  |
| 0.159  | -0.043 | -0.153 | -0.088 | -0.139 | 0.103  | -0.189 | -0.165 | -0.008 | -0.05  | -0.08  | -0.029 | -0.133 |
| 0.035  | 0.112  | -0.19  | -0.09  | -0.015 | 0.006  | 0.471  | -0.115 | -0.073 | 0.031  | -0.025 | 0.026  | 0.162  |
| -0.139 | 0.057  | -0.274 | -0.065 | -0.013 | -0.293 | 0.232  | 0.042  | 0.045  | -0.114 | -0.028 | -0.13  | -0.098 |
| 0.064  | 0.131  | 0.071  | 0.222  | 0.151  | 0.108  | 0.097  | 0.134  | 0.209  | 0.259  | 0.331  | 0.063  | 0.107  |
| -0.162 | 0.077  | 0.099  | 0.042  | 0.087  | 0.082  | 0.126  | 0.102  | 0.009  | -0.004 | 0.121  | 0.178  | 0.183  |
| -0.175 | -0.075 | -0.328 | -0.081 | -0.095 | -0.025 | -0.045 | -0.082 | -0.075 | -0.128 | -0.183 | -0.072 | 0.053  |
| -0.045 | -0.135 | -0.123 | -0.005 | -0.05  | 0.099  | 0.107  | 0.189  | 0.256  | 0.054  | 0.114  | -0.017 | 0.131  |
| -0.17  | 0.019  | -0.159 | 0.001  | -0.041 | 0.008  | 0.025  | 0.476  | -0.264 | -0.246 | -0.169 | 0.04   | 0.152  |
| -0.133 | 0.017  | -0.17  | -0.16  | -0.161 | -0.279 | -0.001 | -0.191 | 0.045  | -0.133 | 0.141  | 0.1    | 0.024  |
| -0.212 | -0.009 | -0.093 | -0.032 | 0.075  | -0.059 | -0.051 | -0.154 | -0.014 | -0.009 | -0.139 | 0.047  | 0.034  |
| -0.343 | -0.026 | 0.017  | 0.029  | 0.024  | -0.121 | 0.101  | -0.139 | -0.125 | -0.121 | -0.03  | 0.003  | -0.017 |
| -0.125 | 0.025  | -0.047 | 0.118  | 0.103  | 0.126  | 0.272  | 0.14   | -0.028 | 0.014  | 0.117  | -0.024 | 0.151  |
| -0.281 | -0.153 | -0.004 | -0.012 | 0.051  | 0.097  | 0.03   | -0.011 | -0.023 | -0.2   | -0.038 | 0.08   | 0.054  |
| -0.167 | -0.002 | -0.124 | -0.095 | -0.11  | -0.051 | -0.022 | -0.142 | 0.011  | -0.062 | 0.017  | -0.014 | 0.104  |
| -0.287 | 0.031  | 0.007  | 0.014  | -0.034 | -0.159 | 0.003  | -0.143 | -0.136 | -0.049 | -0.087 | -0.095 | 0.018  |
| -0.054 | 0.036  | -0.039 | -0.038 | -0.013 | -0.06  | 0.062  | 0.016  | 0.086  | 0.034  | -0.015 | 0.125  | 0.104  |
| -0.158 | 0.045  | 0.184  | 0.086  | 0.1    | 0.122  | 0.075  | 0.174  | 0.277  | 0.219  | 0.215  | -0.027 | 0.101  |
| -0.059 | -0.062 | -0.077 | 0.013  | -0.024 | -0.083 | -0.033 | -0.005 | 0.065  | -0.067 | 0.03   | -0.087 | -0.014 |
| -0.11  | 0.032  | -0.046 | 0.002  | 0.02   | -0.009 | 0.128  | 0.144  | -0.063 | -0.045 | 0.009  | 0.088  | 0.143  |
| -0.27  | -0.187 | 0.035  | 0.142  | 0.137  | 0.142  | 0.14   | 0.094  | 0.038  | -0.032 | -0.244 | -0.017 | 0.087  |
| 0.181  | 0.261  | 0.196  | 0.289  | 0.235  | 0.244  | 0.314  | 0.165  | 0.336  | 0.232  | 0.182  | 0.151  | 0.319  |
| 0.116  | 0.158  | 0.048  | -0.07  | 0.114  | -0.013 | 0.07   | -0.062 | 0.184  | -0.005 | 0.167  | 0.118  | 0.24   |
| 0.247  | 0.247  | 0.183  | 0.317  | 0.312  | 0.347  | 0.358  | 0.324  | 0.369  | 0.244  | 0.32   | 0.266  | 0.211  |

| USP8 low patients (n=39) |                |                |                |                |                |                |                |                |                |                |                |                |
|--------------------------|----------------|----------------|----------------|----------------|----------------|----------------|----------------|----------------|----------------|----------------|----------------|----------------|
| Sample<br>.343           | Sample.<br>345 | Sample<br>.351 | Sample.<br>352 | Sample.<br>354 | Sample.<br>355 | Sample.<br>363 | Sample.<br>379 | Sample<br>.387 | Sample.<br>389 | Sample.<br>391 | Sample.<br>397 | Sample.<br>398 |
| -0.094                   | -0.019         | 0.025          | -0.1           | -0.052         | -0.131         | 0.135          | -0.221         | -0.288         | -0.226         | -0.069         | -0.149         | -0.074         |
| 0.159                    | 0.279          | 0.088          | 0.119          | -0.146         | -0.073         | -0.02          | 0.116          | 0.074          | 0              | 0.059          | 0.17           | -0.046         |
| 0.172                    | 0.162          | 0.274          | 0.289          | 0.558          | 0.137          | 0.24           | 0.214          | 0.231          | 0.326          | 0.13           | 0.475          | 0.106          |
| -0.182                   | 0.092          | 0.068          | -0.049         | -0.063         | -0.146         | -0.182         | 0.052          | 0.06           | -0.084         | -0.089         | 0.026          | 0.035          |
| -0.026                   | -0.096         | 0.122          | -0.022         | 0.101          | -0.007         | -0.17          | 0.1            | -0.142         | -0.02          | -0.097         | 0.035          | 0.045          |
| 0.176                    | 0.351          | 0.368          | 0.218          | 0.204          | 0.107          | 0.082          | 0.306          | 0.291          | 0.352          | 0.235          | 0.189          | 0.067          |
| 0.058                    | 0.085          | 0.16           | 0.281          | 0.018          | 0.007          | 0.05           | 0.224          | -0.03          | 0.056          | 0.045          | 0.078          | -0.033         |
| 0.157                    | 0.207          | 0.195          | 0.141          | 0.177          | 0.152          | 0.204          | 0.177          | 0.172          | 0.234          | 0.039          | 0.16           | 0.156          |
| -0.126                   | -0.109         | 0.049          | 0.089          | -0.074         | -0.239         | -0.192         | -0.027         | -0.183         | -0.214         | -0.143         | -0.162         | -0.257         |
| -0.046                   | 0.089          | -0.052         | -0.021         | -0.045         | -0.044         | -0.072         | -0.21          | -0.096         | 0.013          | -0.111         | -0.054         | -0.21          |
| 0.303                    | 0.373          | 0.059          | 0.089          | 0.318          | -0.161         | -0.13          | 0.026          | 0.251          | 0.352          | 0.216          | 0.477          | -0.048         |
| 0.128                    | 0.2            | 0.245          | 0.185          | 0.145          | 0.14           | 0.102          | 0.092          | -0.015         | 0.012          | -0.043         | 0.095          | 0.114          |
| 0.017                    | 0.043          | 0.086          | -0.003         | -0.089         | -0.151         | -0.176         | 0.037          | -0.105         | -0.075         | 0.064          | -0.118         | -0.081         |
| 0.146                    | 0.154          | 0.148          | 0.256          | 0.219          | 0.024          | 0.213          | 0.341          | 0.038          | 0.006          | 0.194          | 0.069          | 0.019          |
| 0.09                     | 0.027          | 0.077          | 0.055          | 0.078          | -0.11          | 0.119          | 0.116          | -0.101         | -0.062         | 0.073          | 0.137          | 0.033          |
| 0.146                    | 0.154          | 0.148          | 0.256          | 0.219          | 0.024          | 0.213          | 0.341          | 0.038          | 0.006          | 0.194          | 0.069          | 0.019          |
| 0.09                     | 0.027          | 0.077          | 0.055          | 0.078          | -0.11          | 0.119          | 0.116          | -0.101         | -0.062         | 0.073          | 0.137          | 0.033          |
| 0.163                    | 0.206          | 0.154          | 0.14           | 0.179          | 0.117          | 0.163          | 0.228          | 0.167          | 0.145          | 0.228          | 0.231          | 0.138          |
| 0.106                    | 0.163          | 0.149          | 0.202          | 0.112          | -0.057         | -0.046         | 0.093          | 0.079          | 0.17           | 0.296          | 0.136          | -0.119         |
| 0.198                    | 0.354          | 0.334          | 0.238          | 0.237          | 0.077          | 0.251          | 0.169          | 0.245          | 0.372          | 0.166          | 0.289          | 0.195          |
| 0.011                    | 0.144          | 0.076          | -0.015         | 0.079          | -0.06          | -0.104         | 0.068          | 0.047          | 0.108          | 0.013          | -0.023         | 0.03           |
| -0.017                   | 0.117          | 0.127          | 0.042          | 0.107          | -0.143         | -0.001         | 0.124          | 0.119          | -0.007         | 0.033          | 0.034          | -0.373         |
| -0.018                   | 0.066          | 0.009          | -0.002         | -0.076         | -0.192         | -0.203         | -0.008         | -0.04          | -0.045         | -0.022         | 0.067          | -0.162         |
| 0.118                    | 0.024          | 0.018          | 0.051          | -0.02          | 0.194          | -0.074         | -0.044         | 0.089          | -0.111         | 0.014          | 0.084          | -0.059         |
| -0.066                   | -0.16          | -0.065         | -0.057         | -0.035         | -0.053         | -0.074         | -0.149         | -0.102         | 0.146          | -0.05          | -0.13          | -0.017         |
| 0.121                    | 0.037          | 0.072          | 0.043          | 0.178          | -0.027         | -0.175         | 0.178          | 0.083          | -0.026         | 0.099          | 0.197          | 0.297          |
| 0.153                    | 0.128          | 0.296          | 0.253          | 0.288          | 0.329          | 0.18           | 0.271          | 0.273          | 0.237          | 0.223          | 0.195          | 0.321          |
| 0.085                    | 0.264          | 0.227          | 0.127          | 0.045          | -0.055         | 0.01           | -0.122         | 0.241          | 0.225          | 0.005          | 0.375          | 0.104          |
| 0.054                    | 0.091          | 0.149          | 0.198          | 0.345          | 0.05           | 0.054          | 0.128          | 0.166          | 0.059          | 0.073          | 0.312          | 0.009          |
| 0.262                    | 0.313          | 0.366          | 0.268          | 0.365          | 0.182          | 0.162          | 0.389          | 0.291          | 0.177          | 0.293          | 0.479          | 0.187          |
| 0.239                    | 0.244          | 0.261          | 0.293          | 0.305          | 0.164          | 0.355          | 0.332          | 0.133          | 0.208          | 0.206          | 0.319          | 0.047          |
| 0.301                    | 0.42           | 0.148          | 0.187          | 0.147          | 0.254          | 0.131          | 0.262          | 0.216          | 0.474          | 0.31           | 0.297          | 0.147          |
| 0.131                    | 0.241          | 0.084          | 0.1            | 0.141          | 0.126          | -0.021         | 0.157          | 0.222          | 0.247          | 0.033          | 0.208          | 0.074          |
| -0.155                   | 0.005          | 0.137          | -0.069         | 0.014          | -0.193         | 0.041          | 0.31           | 0.116          | 0.137          | -0.199         | -0.03          | 0.099          |
| 0.073                    | 0.061          | 0.099          | 0.158          | 0.187          | 0.083          | 0.13           | 0.202          | -0.001         | -0.063         | 0.082          | 0.02           | -0.105         |
| 0.001                    | -0.048         | -0.056         | 0.073          | -0.062         | -0.042         | -0.089         | 0.044          | -0.118         | -0.095         | 0.073          | 0.015          | 0.044          |
| -0.04                    | 0.011          | 0.053          | 0.017          | -0.003         | -0.117         | -0.08          | 0.23           | 0.004          | -0.021         | -0.064         | 0.133          | 0.004          |
| -0.028                   | 0.112          | 0.105          | 0.136          | -0.023         | -0.058         | 0.023          | 0.159          | 0.027          | 0.026          | 0.02           | 0.027          | -0.071         |
| 0.11                     | 0.055          | 0.087          | 0.141          | 0.121          | -0.006         | 0.038          | 0.178          | -0.1           | -0.117         | 0.155          | 0.073          | -0.054         |
| 0.104                    | 0.183          | 0.185          | 0.287          | 0.308          | 0.129          | 0.217          | 0.313          | 0.255          | 0.226          | 0.13           | 0.351          | 0.149          |
| 0.029                    | 0.208          | 0.16           | 0.073          | 0.098          | 0.094          | -0.034         | 0.021          | 0.124          | -0.035         | 0.138          | 0.171          | 0.038          |
| 0.108                    | 0.037          | 0.064          | 0.082          | -0.022         | 0.005          | -0.11          | 0.23           | 0.027          | 0.152          | -0.001         | 0.142          | 0.088          |
| -0.059                   | 0.065          | 0.031          | -0.003         | 0.009          | -0.062         | 0.251          | 0.016          | 0.208          | 0.053          | 0.016          | 0.165          | -0.116         |
| 0.007                    | 0.052          | 0.038          | 0.089          | 0.136          | -0.019         | 0.061          | 0.107          | 0.051          | 0.131          | -0.002         | 0.053          | 0.062          |
| -0.095                   | -0.01          | -0.13          | -0.118         | -0.112         | -0.175         | -0.25          | 0.06           | 0.056          | -0.183         | -0.024         | 0.023          | -0.373         |
| 0.283                    | 0.416          | 0.215          | 0.243          | 0.197          | 0.224          | 0.264          | 0.473          | 0.313          | 0.319          | 0.248          | 0.286          | 0.202          |
| 0.051                    | 0.151          | 0.066          | 0.198          | 0.01           | -0.085         | -0.047         | 0.147          | 0.095          | 0.119          | 0.048          | 0.094          | -0.077         |

|        |        |        |        |        |        |        |        |        |        |        |        |        |
|--------|--------|--------|--------|--------|--------|--------|--------|--------|--------|--------|--------|--------|
| 0.422  | 0.54   | 0.535  | 0.61   | 0.598  | 0.238  | 0.513  | 0.404  | 0.198  | 0.082  | 0.372  | 0.391  | 0.184  |
| 0.049  | 0.118  | 0.612  | 0.18   | 0.171  | 0.191  | -0.017 | 0.149  | 0.122  | 0.052  | 0.064  | 0.16   | -0.041 |
| -0.033 | 0.031  | -0.18  | 0      | 0.095  | -0.158 | -0.065 | -0.062 | 0.001  | -0.087 | 0.007  | 0.186  | -0.058 |
| 0.153  | 0.193  | 0.085  | 0.189  | 0.231  | 0.165  | 0.142  | 0.311  | 0.25   | 0.306  | 0.078  | 0.24   | 0.155  |
| 0.138  | 0.061  | 0.013  | 0.148  | 0.068  | -0.111 | 0.061  | 0.009  | -0.12  | -0.028 | 0.136  | 0.066  | 0.2    |
| -0.039 | 0.174  | 0.108  | -0.007 | -0.142 | -0.223 | -0.064 | 0.19   | -0.102 | -0.11  | -0.02  | -0.061 | -0.246 |
| 0.158  | 0.255  | 0.237  | 0.235  | 0.179  | -0.066 | 0.364  | 0.249  | 0.207  | 0.291  | 0.139  | 0.027  | -0.071 |
| 0.205  | 0.317  | 0.439  | 0.222  | 0.311  | 0.114  | 0.291  | 0.362  | 0.325  | 0.343  | 0.255  | 0.053  | 0.189  |
| 0.139  | 0.254  | 0.276  | 0.236  | 0.176  | 0.107  | 0.057  | 0.449  | 0.251  | 0.179  | 0.207  | 0.197  | 0.079  |
| 0.034  | 0.024  | 0.08   | 0.034  | 0.085  | -0.012 | 0.054  | 0.078  | -0.037 | -0.016 | 0.004  | 0.003  | 0.19   |
| 0.495  | 0.474  | 0.214  | 0.46   | 0.6    | 0.378  | 0.377  | 0.381  | 0.529  | 0.194  | 0.598  | 0.355  | 0.282  |
| 0.024  | -0.06  | 0.065  | 0.107  | 0.051  | 0.008  | -0.068 | 0.083  | -0.113 | -0.047 | 0.006  | 0.022  | 0.053  |
| 0.027  | 0.107  | 0.028  | 0.192  | 0.163  | -0.036 | 0.16   | 0.156  | -0.06  | -0.142 | -0.094 | -0.001 | -0.152 |
| -0.087 | -0.066 | -0.145 | -0.087 | -0.085 | -0.058 | -0.205 | -0.056 | -0.186 | -0.232 | -0.192 | 0.167  | -0.017 |
| -0.085 | 0.082  | 0.083  | 0.049  | -0.004 | -0.031 | 0.646  | 0.132  | 0.058  | -0.135 | 0.02   | -0.042 | -0.214 |
| -0.214 | -0.099 | -0.081 | -0.136 | -0.101 | -0.247 | -0.392 | -0.094 | -0.089 | -0.217 | -0.122 | -0.107 | -0.418 |
| 0.169  | 0.275  | 0.08   | 0.011  | 0.255  | 0.048  | 0.233  | 0.143  | 0.239  | 0.049  | 0.197  | 0.121  | -0.079 |
| 0.079  | 0.097  | 0.081  | 0.123  | 0.191  | 0.009  | 0.094  | 0.194  | 0.048  | -0.047 | 0.05   | 0.218  | 0.152  |
| -0.089 | 0.007  | 0.036  | 0.026  | -0.044 | -0.171 | -0.067 | -0.067 | 0.021  | -0.072 | -0.009 | 0.006  | -0.061 |
| -0.051 | 0.127  | 0.086  | 0.111  | -0.041 | -0.223 | 0.001  | 0.016  | 0.257  | 0.103  | -0.054 | 0.012  | -0.064 |
| -0.081 | -0.021 | 0.063  | 0.055  | 0.049  | -0.443 | -0.075 | 0.086  | -0.005 | -0.015 | -0.071 | -0.067 | -0.212 |
| -0.086 | -0.009 | 0.135  | 0.118  | 0.108  | 0.02   | 0.433  | -0.048 | -0.264 | -0.204 | -0.161 | -0.044 | 0.557  |
| -0.003 | 0.065  | 0.004  | 0.095  | -0.088 | -0.182 | -0.037 | 0.078  | -0.055 | -0.091 | -0.035 | 0.107  | -0.132 |
| -0.022 | -0.027 | -0.126 | -0.037 | -0.025 | -0.022 | -0.203 | -0.004 | -0.079 | -0.143 | -0.013 | 0.035  | 0.098  |
| -0.004 | 0.084  | 0.052  | 0.117  | 0.08   | 0.014  | -0.15  | 0.137  | 0.137  | 0.085  | 0.095  | 0.104  | -0.035 |
| -0.068 | 0.034  | 0.15   | 0.053  | -0.049 | -0.087 | -0.185 | 0.13   | 0.014  | 0.053  | -0.029 | 0.146  | 0.04   |
| -0.126 | -0.005 | 0.088  | -0.015 | 0.05   | 0.015  | -0.142 | -0.075 | -0.001 | 0.058  | -0.046 | -0.093 | -0.2   |
| 0.053  | -0.042 | 0.048  | -0.017 | 0.064  | 0.034  | -0.089 | -0.026 | -0.093 | -0.163 | -0.109 | 0.066  | -0.012 |
| 0.019  | 0.075  | 0.057  | 0.058  | 0.022  | -0.111 | 0.114  | 0.103  | -0.008 | -0.069 | 0.011  | -0.025 | -0.093 |
| 0.094  | 0.054  | -0.002 | 0.024  | 0.159  | -0.044 | -0.226 | 0.306  | 0.225  | -0.052 | 0.124  | 0.356  | 0.178  |
| -0.027 | 0.034  | -0.065 | 0.005  | -0.027 | -0.048 | -0.054 | -0.022 | 0.018  | -0.033 | -0.067 | -0.087 | -0.056 |
| -0.054 | 0.044  | -0.134 | -0.044 | 0.005  | -0.202 | -0.005 | 0.134  | 0.052  | 0.082  | -0.006 | 0.044  | -0.282 |
| 0.135  | 0.168  | 0.203  | 0.159  | 0.157  | 0.062  | -0.036 | 0.212  | 0.206  | 0.169  | 0.107  | 0.145  | 0.006  |
| 0.203  | 0.316  | 0.337  | 0.292  | 0.348  | 0.314  | 0.409  | 0.376  | 0.328  | 0.225  | 0.247  | 0.209  | 0.076  |
| 0.13   | 0.212  | 0.183  | 0.19   | 0.184  | 0.059  | 0.221  | 0.233  | 0.092  | 0.041  | 0.125  | 0.182  | 0.108  |
| 0.186  | 0.303  | 0.16   | 0.256  | 0.179  | 0.212  | 0.154  | 0.207  | 0.302  | 0.249  | 0.207  | 0.388  | 0.179  |

| USP8 high patients (n=38) |                |                |                |                |                |                |                |                |                |                |                |                |
|---------------------------|----------------|----------------|----------------|----------------|----------------|----------------|----------------|----------------|----------------|----------------|----------------|----------------|
| Sample.<br>170            | Sample<br>.172 | Sample<br>.174 | Sample<br>.175 | Sample<br>.181 | Sample<br>.183 | Sample<br>.189 | Sample.<br>190 | Sample<br>.205 | Sample<br>.208 | Sample.<br>209 | Sample<br>.218 | Sample<br>.222 |
| -0.08                     | -0.103         | -0.367         | -0.278         | 0.025          | -0.23          | -0.17          | -0.038         | -0.056         | -0.079         | -0.376         | -0.222         | -0.224         |
| 0.256                     | 0.098          | -0.227         | 0.012          | 0.104          | 0.109          | 0.225          | 0.109          | -0.08          | 0.101          | -0.48          | -0.121         | 0.014          |
| 0.279                     | 0.297          | -0.055         | 0.283          | 0.039          | 0.039          | 0.28           | -0.005         | -0.022         | -0.02          | -0.435         | 0.206          | 0.112          |
| -0.318                    | -0.087         | -0.656         | 0.029          | -0.255         | -0.313         | -0.443         | -0.314         | -0.156         | -0.065         | -0.521         | -0.016         | -0.095         |
| -0.085                    | 0.161          | -0.278         | -0.086         | 0.08           | -0.015         | 0.001          | 0.012          | -0.151         | -0.039         | -0.236         | -0.094         | -0.091         |
| -0.088                    | 0.131          | -0.181         | 0.289          | 0.079          | -0.105         | -0.145         | -0.144         | -0.185         | 0.173          | -0.421         | 0              | 0.258          |
| -0.233                    | 0.133          | -0.321         | -0.052         | 0.009          | -0.031         | -0.145         | -0.127         | -0.157         | -0.089         | -0.363         | 0.027          | 0.028          |
| -0.233                    | -0.132         | -0.403         | 0.137          | -0.186         | -0.365         | -0.378         | -0.436         | -0.124         | -0.108         | -0.497         | 0.133          | 0.295          |
| -0.704                    | -0.554         | -0.991         | -0.446         | -0.257         | -0.721         | -0.679         | -0.733         | -0.27          | -0.349         | -0.595         | -0.193         | -0.253         |
| -0.537                    | -0.149         | -0.709         | -0.261         | -0.29          | -0.189         | -0.583         | -0.365         | -0.369         | -0.244         | -0.532         | 0.444          | -0.036         |
| 0.256                     | 0.228          | -0.211         | -0.127         | -0.282         | 0.396          | 0.115          | 0.465          | 0.277          | 0.228          | -0.043         | 0.14           | 0.112          |
| -0.606                    | -0.213         | -0.878         | -0.207         | -0.148         | -0.335         | -0.717         | -0.609         | -0.308         | -0.086         | -0.565         | 0.209          | 0.24           |
| -0.234                    | -0.15          | -0.521         | -0.21          | 0.022          | -0.166         | -0.292         | -0.069         | -0.227         | 0.071          | -0.322         | -0.143         | -0.057         |
| -0.362                    | -0.047         | -0.689         | -0.084         | -0.064         | 0.049          | -0.348         | -0.274         | -0.058         | 0.012          | -0.455         | 0.125          | 0.105          |
| 0.069                     | 0.114          | -0.511         | 0.116          | -0.028         | 0.092          | -0.349         | -0.172         | -0.152         | 0.013          | -0.481         | -0.014         | 0.009          |
| -0.362                    | -0.047         | -0.689         | -0.084         | -0.064         | 0.049          | -0.348         | -0.274         | -0.058         | 0.012          | -0.455         | 0.125          | 0.105          |
| 0.069                     | 0.114          | -0.511         | 0.116          | -0.028         | 0.092          | -0.349         | -0.172         | -0.152         | 0.013          | -0.481         | -0.014         | 0.009          |
| -0.298                    | 0.01           | -0.302         | -0.148         | -0.004         | -0.11          | -0.374         | -0.12          | -0.064         | -0.006         | -0.206         | 0.188          | 0.077          |
| 0.21                      | 0.207          | -0.276         | -0.093         | 0.37           | 0.092          | 0.043          | 0.048          | -0.198         | 0.004          | -0.328         | -0.085         | -0.082         |
| -0.375                    | 0.069          | -0.526         | -0.005         | 0.068          | -0.013         | -0.312         | -0.311         | -0.126         | 0.188          | -0.394         | 0.178          | 0.226          |
| -0.048                    | -0.114         | -0.172         | -0.105         | 0.029          | -0.128         | -0.175         | -0.162         | -0.171         | 0.059          | -0.21          | 0.047          | 0.017          |
| -0.155                    | 0.043          | -0.588         | -0.119         | -0.165         | -0.304         | -0.344         | -0.242         | -0.384         | -0.156         | -0.518         | -0.055         | -0.066         |
| -0.134                    | 0.003          | -0.526         | -0.028         | -0.041         | -0.041         | -0.265         | -0.159         | -0.236         | -0.014         | -0.365         | -0.068         | -0.146         |
| 0.143                     | 0.042          | -0.713         | 0.126          | -0.119         | 0.187          | 0.092          | 0.16           | 0.049          | -0.077         | -0.286         | -0.21          | -0.069         |
| 0.084                     | -0.014         | 0.005          | -0.003         | 0.037          | -0.135         | 0.094          | -0.068         | -0.142         | 0.112          | -0.05          | 0.06           | -0.069         |
| 0.129                     | 0.117          | -0.265         | 0.312          | 0.041          | 0.05           | 0.429          | 0.033          | 0.01           | -0.001         | -0.589         | 0.059          | 0.381          |
| -0.235                    | 0.197          | -0.005         | 0.116          | -0.001         | -0.395         | 0.104          | -0.151         | -0.162         | -0.021         | -0.294         | 0.1            | 0.154          |
| 0.355                     | 0.211          | -0.073         | -0.092         | 0.246          | 0.148          | 0.074          | -0.055         | -0.226         | 0.093          | -0.501         | 0.037          | 0.168          |
| 0.006                     | 0.06           | -0.533         | -0.101         | 0.003          | 0.059          | 0.017          | 0.203          | -0.07          | 0.119          | -0.222         | 0.109          | 0.217          |
| -0.356                    | 0.043          | -0.517         | 0.082          | 0.167          | 0.058          | 0.006          | 0.028          | -0.095         | 0.101          | -0.471         | 0.319          | 0.262          |
| -0.083                    | 0.115          | -0.288         | -0.101         | -0.059         | 0.079          | -0.152         | -0.112         | -0.087         | 0.003          | -0.547         | 0.109          | 0.159          |
| 0.358                     | 0.344          | -0.091         | 0.146          | -0.053         | 0.146          | 0.083          | 0.063          | -0.069         | 0.232          | -0.463         | 0.121          | 0.033          |
| -0.219                    | -0.019         | -0.418         | 0.012          | -0.013         | -0.098         | -0.143         | -0.143         | -0.135         | -0.074         | -0.315         | -0.183         | 0.053          |
| -0.508                    | -0.179         | -0.742         | 0.123          | -0.453         | -0.395         | -0.554         | -0.65          | -0.14          | -0.158         | -0.48          | 0.009          | 0.18           |
| -0.219                    | -0.101         | -0.489         | -0.218         | -0.191         | -0.138         | -0.378         | -0.25          | -0.287         | -0.155         | -0.339         | 0.124          | 0.02           |
| -0.267                    | -0.187         | -0.445         | -0.247         | -0.048         | -0.111         | -0.279         | -0.311         | -0.233         | -0.108         | -0.313         | -0.032         | -0.182         |
| 0.13                      | 0.141          | -0.173         | 0.136          | 0.07           | -0.037         | -0.001         | 0.036          | -0.185         | 0.028          | -0.496         | -0.041         | 0.017          |
| -0.194                    | 0.031          | -0.501         | -0.191         | -0.041         | -0.238         | -0.326         | -0.187         | -0.164         | -0.137         | -0.587         | 0.026          | 0              |
| 0.007                     | 0.077          | -0.246         | 0.013          | -0.028         | 0.097          | -0.063         | 0.022          | -0.086         | 0.092          | -0.343         | -0.002         | 0.132          |
| 0.28                      | 0.302          | 0.006          | 0.049          | 0.185          | 0.047          | 0.371          | 0.195          | -0.057         | 0.235          | -0.336         | 0.103          | 0.036          |
| -0.051                    | -0.076         | -0.515         | -0.059         | -0.017         | -0.052         | -0.269         | -0.118         | -0.214         | 0.054          | -0.412         | 0.053          | 0.365          |
| 0.089                     | 0.051          | -0.061         | -0.03          | -0.022         | -0.109         | -0.242         | -0.081         | -0.118         | -0.067         | -0.467         | 0.016          | 0.12           |
| -0.068                    | 0.055          | -0.018         | 0.149          | -0.073         | -0.126         | -0.081         | -0.186         | 0.006          | -0.103         | -0.372         | -0.192         | -0.083         |
| -0.219                    | -0.059         | -0.334         | -0.119         | 0.023          | -0.161         | -0.282         | -0.232         | -0.19          | -0.057         | -0.342         | -0.12          | 0.007          |
| -0.007                    | -0.014         | -0.405         | -0.12          | -0.232         | -0.118         | -0.055         | -0.291         | -0.18          | -0.303         | -0.545         | -0.41          | -0.262         |
| 0.319                     | 0.309          | 0.143          | 0.17           | 0.102          | 0.124          | -0.075         | -0.083         | 0.013          | 0.091          | -0.621         | 0.259          | 0.097          |
| 0.105                     | 0.105          | -0.223         | -0.031         | 0.061          | 0.129          | 0.056          | 0.222          | -0.134         | 0.079          | -0.582         | 0.041          | -0.053         |

|        |        |        |        |        |        |        |        |        |        |        |        |        |
|--------|--------|--------|--------|--------|--------|--------|--------|--------|--------|--------|--------|--------|
| 0.323  | 0.595  | -0.129 | 0.044  | 0.067  | 0.328  | -0.482 | 0.243  | -0.177 | 0.44   | -0.458 | 0.272  | 0.296  |
| 0.051  | 0.119  | -0.282 | -0.226 | 0.067  | -0.053 | -0.157 | -0.077 | -0.235 | 0.016  | -0.445 | -0.066 | -0.184 |
| -0.096 | -0.12  | -0.319 | -0.225 | -0.382 | -0.146 | -0.261 | -0.283 | -0.265 | -0.139 | -0.311 | -0.242 | -0.222 |
| -0.264 | 0.067  | -0.469 | 0.061  | 0.061  | -0.054 | -0.267 | -0.078 | -0.068 | -0.008 | -0.337 | 0.129  | 0.181  |
| -0.472 | -0.264 | -0.625 | -0.32  | -0.36  | -0.163 | -0.671 | -0.608 | -0.27  | 0.034  | -0.468 | 0.104  | 0.061  |
| -0.635 | -0.194 | -1.04  | -0.286 | -0.121 | -0.325 | -0.522 | -0.446 | -0.41  | -0.16  | -0.467 | -0.065 | 0.013  |
| 0.149  | 0.194  | -0.223 | 0.119  | 0.068  | 0.023  | -0.148 | -0.001 | -0.007 | -0.035 | -0.135 | 0.198  | 0.202  |
| 0.036  | 0.134  | -0.171 | 0.346  | 0.03   | 0.073  | -0.134 | 0.005  | -0.074 | 0.127  | -0.267 | 0.21   | 0.441  |
| -0.349 | 0.044  | -0.623 | 0.006  | 0.084  | 0.017  | -0.135 | -0.091 | 0.081  | -0.031 | -0.427 | 0.211  | 0.122  |
| -0.592 | -0.232 | -0.626 | -0.227 | -0.152 | -0.159 | -0.573 | -0.346 | -0.215 | -0.05  | -0.469 | -0.027 | -0.028 |
| 0.001  | 0.382  | -0.041 | -0.018 | 0.113  | 0.046  | -0.355 | -0.053 | -0.117 | 0.074  | -0.37  | 0.623  | 0.24   |
| 0.012  | 0.091  | 0.056  | 0.03   | -0.013 | -0.061 | 0.122  | -0.002 | -0.141 | -0.008 | -0.12  | 0.039  | -0.026 |
| -0.706 | -0.508 | -1.039 | -0.447 | -0.376 | -0.428 | -0.675 | -0.696 | -0.351 | -0.102 | -0.547 | 0.08   | 0.1    |
| -0.372 | -0.168 | -0.664 | -0.377 | -0.289 | -0.41  | -0.504 | -0.552 | -0.216 | -0.285 | -0.51  | -0.166 | -0.191 |
| 0.388  | 0.133  | -0.271 | -0.21  | -0.108 | -0.057 | -0.079 | -0.072 | -0.201 | -0.294 | -0.534 | -0.261 | -0.225 |
| -0.191 | -0.084 | -0.726 | -0.475 | -0.387 | -0.246 | -0.364 | -0.265 | -0.339 | -0.261 | -0.488 | -0.217 | -0.318 |
| 0.073  | 0.063  | -0.241 | 0.074  | -0.013 | -0.112 | -0.099 | 0.149  | -0.067 | 0.082  | -0.34  | -0.02  | 0.176  |
| -0.396 | -0.17  | -0.661 | -0.189 | -0.057 | -0.107 | -0.435 | -0.303 | -0.18  | 0.019  | -0.536 | 0.029  | -0.088 |
| -0.071 | -0.15  | -0.298 | -0.162 | -0.215 | -0.287 | -0.192 | -0.293 | -0.271 | -0.113 | -0.522 | -0.089 | -0.265 |
| -0.462 | -0.087 | -0.548 | -0.202 | -0.082 | -0.394 | -0.4   | -0.341 | -0.342 | -0.211 | -0.599 | -0.096 | -0.24  |
| -0.259 | -0.186 | -0.463 | -0.099 | -0.061 | -0.032 | -0.181 | -0.287 | -0.222 | -0.069 | -0.426 | -0.1   | -0.301 |
| -0.813 | -0.649 | -0.906 | -0.252 | -0.598 | -0.82  | -0.809 | -0.913 | -0.287 | -0.115 | -0.435 | 0.127  | 0.018  |
| 0.03   | 0.095  | -0.439 | -0.081 | -0.034 | 0.038  | -0.143 | -0.273 | -0.179 | -0.097 | -0.242 | 0      | 0.041  |
| -0.195 | -0.004 | -0.404 | -0.105 | -0.109 | -0.1   | -0.311 | -0.251 | -0.145 | 0.001  | -0.158 | -0.146 | -0.017 |
| 0.007  | 0.06   | -0.214 | -0.106 | 0.04   | -0.122 | 0.165  | -0.015 | -0.329 | 0.085  | -0.512 | -0.159 | 0.026  |
| -0.574 | -0.172 | -0.744 | -0.069 | 0.063  | -0.207 | -0.269 | -0.294 | -0.273 | -0.14  | -0.464 | -0.017 | 0.117  |
| -0.531 | -0.268 | -0.544 | -0.295 | -0.253 | -0.368 | -0.508 | -0.327 | -0.297 | -0.337 | -0.517 | -0.15  | -0.192 |
| -0.475 | -0.16  | -0.484 | -0.237 | -0.048 | -0.138 | -0.329 | -0.205 | -0.117 | -0.084 | -0.16  | -0.002 | -0.134 |
| -0.065 | 0.145  | -0.319 | -0.032 | -0.053 | -0.145 | -0.227 | -0.105 | -0.299 | 0.259  | -0.478 | 0.007  | -0.125 |
| 0.126  | 0.182  | -0.001 | 0.141  | 0.087  | 0.166  | -0.123 | -0.022 | -0.065 | 0.073  | -0.251 | 0.05   | -0.032 |
| -0.738 | -0.428 | -1.016 | -0.555 | -0.449 | -0.581 | -0.607 | -0.619 | -0.397 | -0.386 | -0.55  | -0.395 | -0.424 |
| 0.049  | -0.049 | -0.259 | -0.056 | 0.053  | 0.051  | 0.144  | 0.061  | -0.045 | -0.089 | -0.034 | -0.118 | -0.22  |
| -0.209 | -0.034 | -0.491 | 0.057  | 0.046  | 0.062  | -0.032 | -0.202 | -0.133 | 0.049  | -0.441 | 0.115  | 0.103  |
| -0.336 | -0.05  | -0.439 | -0.234 | 0.046  | 0.081  | -0.351 | -0.24  | 0.013  | 0.005  | -0.277 | 0.248  | 0.262  |
| -0.184 | 0.062  | -0.216 | 0.139  | 0.065  | -0.025 | -0.181 | 0.013  | -0.193 | -0.041 | -0.473 | 0.149  | 0.145  |
| 0.038  | 0.13   | -0.296 | 0.002  | 0.057  | -0.083 | 0.054  | 0.053  | -0.015 | -0.009 | -0.501 | 0.129  | 0.161  |



| USP8 high patients (n=38) |                |                |                |                |                |                |                |                |                |                |                |                |
|---------------------------|----------------|----------------|----------------|----------------|----------------|----------------|----------------|----------------|----------------|----------------|----------------|----------------|
| Sample<br>.224            | Sample.<br>243 | Sample<br>.245 | Sample.<br>259 | Sample.<br>265 | Sample.<br>269 | Sample<br>.297 | Sample.<br>310 | Sample.<br>324 | Sample<br>.340 | Sample<br>.359 | Sample<br>.369 | Sample.<br>401 |
| -0.196                    | -0.242         | 0.106          | -0.141         | -0.235         | -0.315         | -0.249         | -0.421         | -0.47          | -0.211         | -0.123         | 0.348          | -0.253         |
| -0.19                     | 0.034          | 0.143          | -0.207         | 0.046          | 0.059          | -0.161         | -0.18          | -0.197         | 0.008          | 0.043          | -0.02          | -0.03          |
| 0.052                     | 0.168          | 0.142          | -0.035         | 0.106          | 0.073          | -0.032         | 0.257          | 0.174          | 0.434          | 0.228          | 0.122          | 0.009          |
| -0.196                    | -0.204         | -0.071         | -0.304         | -0.174         | -0.387         | -0.125         | -0.046         | -0.506         | -0.254         | 0.019          | -0.04          | -0.157         |
| -0.259                    | -0.178         | -0.144         | -0.347         | -0.205         | -0.061         | -0.035         | -0.249         | -0.641         | -0.008         | -0.113         | -0.182         | -0.256         |
| -0.109                    | -0.053         | 0.219          | -0.048         | 0.107          | 0.105          | -0.046         | 0.236          | 0.222          | 0.233          | 0.09           | 0.151          | 0.138          |
| -0.107                    | -0.051         | -0.034         | -0.286         | -0.069         | -0.019         | -0.05          | 0.132          | -0.033         | 0.012          | -0.014         | 0.156          | -0.252         |
| -0.155                    | -0.081         | 0.111          | 0.03           | 0.011          | 0.066          | -0.203         | 0.14           | 0.166          | 0.089          | -0.136         | 0.068          | -0.08          |
| -0.477                    | -0.506         | -0.351         | -0.493         | -0.505         | -0.391         | -0.352         | -0.082         | -0.3           | 0.032          | -0.362         | -0.108         | -0.491         |
| -0.312                    | -0.083         | -0.078         | -0.2           | -0.198         | -0.138         | -0.29          | 0.065          | -0.394         | -0.217         | -0.102         | -0.001         | -0.284         |
| -0.099                    | 0.307          | 0.239          | -0.049         | -0.185         | -0.137         | -0.05          | -0.005         | -0.239         | -0.104         | -0.141         | 0.341          | -0.044         |
| -0.39                     | 0.079          | 0.157          | -0.003         | -0.086         | -0.287         | -0.001         | 0.234          | 0.064          | 0.047          | 0.044          | 0.284          | -0.31          |
| -0.236                    | -0.105         | -0.227         | -0.329         | -0.088         | -0.113         | -0.068         | -0.283         | -0.178         | -0.06          | -0.152         | 0.157          | -0.305         |
| -0.132                    | -0.098         | 0.037          | -0.215         | -0.126         | -0.033         | 0.066          | 0.044          | -0.411         | -0.07          | 0.055          | 0.309          | -0.274         |
| -0.17                     | 0.091          | 0.04           | -0.183         | -0.137         | -0.007         | -0.031         | 0.156          | -0.231         | -0.156         | 0.066          | 0.38           | -0.178         |
| -0.132                    | -0.098         | 0.037          | -0.215         | -0.126         | -0.033         | 0.066          | 0.044          | -0.411         | -0.07          | 0.055          | 0.309          | -0.274         |
| -0.17                     | 0.091          | 0.04           | -0.183         | -0.137         | -0.007         | -0.031         | 0.156          | -0.231         | -0.156         | 0.066          | 0.38           | -0.178         |
| 0.031                     | 0.154          | 0.045          | -0.07          | 0.049          | -0.033         | 0.101          | 0.034          | 0.015          | 0.137          | 0.113          | 0.038          | 0.109          |
| -0.128                    | 0.102          | -0.043         | -0.223         | 0.04           | -0.034         | 0.013          | -0.085         | -0.28          | -0.178         | 0.02           | 0.326          | -0.203         |
| -0.11                     | -0.038         | 0.245          | 0.007          | 0.162          | 0.065          | 0.006          | 0.196          | -0.038         | 0.195          | 0.031          | 0.227          | 0.13           |
| -0.257                    | -0.084         | 0.082          | -0.137         | -0.113         | 0.021          | -0.018         | 0.076          | -0.152         | 0.033          | -0.113         | -0.085         | -0.07          |
| -0.408                    | -0.216         | -0.19          | -0.312         | -0.344         | -0.278         | -0.215         | -0.063         | -0.345         | -0.144         | -0.16          | 0.009          | -0.347         |
| -0.271                    | -0.126         | -0.122         | -0.27          | -0.145         | -0.205         | -0.19          | -0.059         | -0.347         | -0.051         | -0.11          | -0.137         | -0.182         |
| -0.136                    | -0.133         | -0.214         | -0.291         | -0.164         | -0.313         | -0.116         | -0.216         | -0.879         | -0.281         | -0.127         | -0.076         | -0.293         |
| -0.243                    | -0.129         | -0.177         | -0.065         | -0.033         | -0.115         | -0.07          | -0.167         | -0.126         | -0.107         | -0.053         | 0.066          | -0.001         |
| -0.107                    | 0.011          | -0.143         | -0.123         | 0.142          | -0.203         | -0.022         | -0.216         | -0.351         | -0.05          | -0.007         | 0              | -0.076         |
| 0.047                     | 0.025          | 0.029          | 0.054          | -0.037         | 0.068          | 0.026          | 0.203          | 0.121          | 0.277          | 0.255          | 0.099          | 0.062          |
| -0.218                    | -0.013         | 0.31           | -0.151         | 0.084          | 0.016          | -0.008         | -0.154         | -0.383         | -0.13          | 0.025          | -0.007         | 0.147          |
| -0.031                    | -0.006         | -0.02          | -0.183         | -0.16          | -0.113         | 0.006          | 0.118          | -0.173         | 0.126          | -0.099         | 0.063          | -0.118         |
| -0.173                    | -0.007         | 0.148          | -0.075         | 0.193          | 0.158          | 0.077          | 0.056          | -0.213         | 0.319          | 0.036          | 0.215          | -0.102         |
| 0.125                     | 0.287          | 0.032          | -0.072         | -0.08          | 0.106          | 0.212          | 0.12           | -0.067         | 0.347          | 0.122          | 0.013          | 0.072          |
| -0.148                    | 0.278          | 0.582          | -0.176         | -0.214         | -0.226         | -0.047         | 0.359          | 0.022          | 0.071          | 0.258          | 0.411          | 0.159          |
| -0.15                     | -0.055         | -0.124         | -0.198         | -0.187         | -0.029         | -0.256         | 0.057          | 0.005          | 0.151          | 0.007          | -0.085         | -0.179         |
| -0.296                    | -0.209         | -0.023         | -0.186         | -0.069         | -0.151         | -0.278         | 0.336          | 0.051          | 0.26           | -0.218         | 0.005          | -0.2           |
| -0.151                    | 0.039          | -0.12          | -0.154         | -0.128         | -0.161         | -0.04          | -0.172         | -0.25          | -0.105         | -0.101         | 0.041          | -0.044         |
| -0.194                    | -0.004         | 0.051          | -0.195         | -0.122         | 0.061          | 0.046          | -0.085         | -0.007         | 0.017          | -0.042         | -1.002         | 0.027          |
| -0.223                    | -0.176         | 0.017          | -0.288         | -0.034         | -0.073         | -0.031         | -0.157         | -0.292         | 0.13           | -0.163         | -0.158         | -0.228         |
| -0.19                     | -0.146         | 0.016          | -0.305         | -0.158         | -0.097         | -0.033         | -0.055         | -0.283         | 0.075          | -0.116         | -0.086         | -0.157         |
| -0.162                    | -0.027         | -0.106         | -0.208         | 0.064          | 0.108          | 0.133          | 0.093          | -0.038         | 0.053          | -0.073         | 0.054          | -0.193         |
| -0.199                    | -0.023         | 0.06           | -0.2           | 0.184          | 0.18           | 0.052          | 0.282          | 0.085          | 0.268          | 0.187          | 0.139          | -0.035         |
| -0.231                    | -0.026         | 0.143          | -0.227         | -0.055         | 0.055          | -0.043         | -0.126         | -0.095         | -0.114         | -0.06          | 0.115          | -0.092         |
| -0.143                    | 0.031          | -0.119         | -0.21          | -0.003         | 0.146          | 0.036          | 0.122          | -0.176         | 0.088          | -0.031         | -0.26          | 0.02           |
| -0.097                    | -0.23          | -0.146         | -0.244         | -0.045         | -0.165         | -0.199         | -0.043         | -0.126         | 0.12           | 0.196          | 0.033          | -0.296         |
| -0.172                    | -0.199         | -0.08          | -0.216         | -0.138         | -0.249         | -0.122         | -0.079         | -0.378         | 0.089          | 0.005          | 0.002          | -0.292         |
| -0.312                    | -0.378         | -0.195         | -0.442         | -0.363         | -0.286         | -0.323         | -0.325         | -0.348         | -0.215         | -0.233         | -0.304         | -0.154         |
| -0.166                    | 0.214          | 0.136          | -0.039         | 0.044          | -0.003         | 0.116          | 0.221          | 0.13           | 0.207          | 0.096          | 0.289          | 0.167          |
| -0.097                    | -0.08          | 0.062          | -0.276         | -0.086         | 0.083          | 0.157          | -0.047         | -0.234         | 0.131          | -0.012         | -0.072         | -0.116         |

|        |        |        |        |        |        |        |        |        |        |        |        |        |
|--------|--------|--------|--------|--------|--------|--------|--------|--------|--------|--------|--------|--------|
| 0.129  | 0.355  | 0.498  | 0.115  | 0.116  | -0.164 | 0.372  | 0.026  | 0.023  | 0.374  | 0.178  | 0.262  | 0.118  |
| -0.168 | -0.117 | -0.132 | -0.324 | -0.107 | -0.144 | 0.06   | -0.237 | -0.349 | 0.218  | -0.094 | -0.038 | 0.035  |
| -0.208 | -0.306 | -0.273 | -0.35  | -0.328 | -0.321 | -0.326 | -0.194 | -0.516 | -0.107 | -0.031 | -0.188 | -0.223 |
| -0.089 | -0.049 | -0.112 | -0.273 | 0.079  | 0.132  | -0.029 | 0.092  | -0.004 | 0.082  | -0.042 | -0.025 | -0.243 |
| -0.137 | -0.037 | 0.189  | -0.18  | -0.108 | 0.267  | 0.032  | 0.26   | 0.035  | -0.108 | 0.13   | 0.133  | -0.192 |
| -0.484 | -0.103 | -0.074 | -0.293 | -0.206 | -0.134 | -0.116 | -0.153 | -0.331 | -0.073 | -0.26  | -0.067 | -0.349 |
| 0.004  | -0.069 | 0.046  | -0.031 | -0.077 | -0.076 | 0.007  | 0.202  | -0.044 | 0.494  | -0.074 | 0.504  | -0.141 |
| 0.045  | 0.025  | 0.265  | -0.027 | 0.385  | 0.131  | 0.068  | 0.453  | 0.062  | 0.241  | -0.089 | 0.377  | -0.099 |
| -0.112 | 0.052  | 0.051  | -0.027 | -0.014 | -0.053 | 0.149  | 0.055  | -0.099 | 0.272  | 0      | 0.016  | -0.051 |
| -0.152 | -0.119 | 0.011  | -0.192 | -0.142 | -0.189 | 0.107  | 0.055  | -0.303 | -0.03  | -0.095 | 0      | -0.034 |
| 0.203  | 0.343  | 0.357  | 0.068  | 0.194  | 0.115  | 0.128  | 0.205  | -0.094 | 0.538  | -0.04  | 0.408  | 0.128  |
| -0.096 | -0.07  | -0.12  | -0.182 | 0.024  | 0.009  | 0.069  | -0.078 | -0.067 | 0.112  | -0.149 | -0.711 | 0.01   |
| -0.123 | -0.001 | -0.184 | -0.198 | -0.229 | -0.479 | -0.145 | 0.006  | -0.396 | 0.03   | -0.243 | 0.234  | -0.338 |
| -0.361 | -0.113 | -0.13  | -0.333 | -0.229 | -0.238 | -0.236 | -0.266 | -0.43  | -0.071 | -0.179 | -0.257 | -0.241 |
| -0.117 | -0.197 | -0.066 | -0.186 | -0.111 | -0.353 | -0.193 | 0.087  | -0.221 | -0.011 | -0.286 | -1.256 | -0.146 |
| -0.42  | -0.372 | -0.383 | -0.39  | -0.434 | -0.561 | -0.294 | -0.402 | -0.517 | -0.276 | -0.203 | -0.072 | -0.353 |
| 0.007  | 0.067  | -0.048 | -0.149 | 0.088  | -0.032 | 0.053  | 0.234  | 0.005  | 0.168  | 0.144  | 0.034  | -0.172 |
| -0.169 | -0.091 | -0.058 | -0.109 | -0.041 | -0.03  | 0.055  | -0.026 | -0.213 | 0.189  | -0.067 | -0.093 | -0.01  |
| -0.36  | -0.219 | -0.157 | -0.231 | -0.236 | -0.338 | -0.289 | -0.046 | -0.604 | -0.02  | -0.021 | -0.023 | 0.002  |
| -0.229 | -0.091 | -0.141 | -0.252 | -0.241 | -0.27  | -0.247 | 0.157  | -0.284 | 0.013  | -0.089 | -0.006 | -0.161 |
| -0.155 | -0.246 | -0.267 | -0.194 | -0.379 | -0.347 | -0.042 | -0.238 | -0.469 | 0.098  | -0.096 | -0.096 | -0.16  |
| 0.041  | -0.032 | 0.197  | -0.095 | -0.095 | -0.415 | -0.16  | 0.277  | -0.43  | -0.044 | 0.041  | 0.156  | -0.07  |
| -0.357 | -0.206 | -0.092 | -0.362 | -0.134 | -0.095 | -0.173 | -0.047 | -0.214 | -0.081 | -0.164 | -0.106 | -0.332 |
| -0.229 | -0.192 | -0.183 | -0.104 | -0.157 | -0.022 | -0.122 | -0.292 | -0.144 | -0.202 | -0.112 | -0.327 | -0.151 |
| -0.241 | -0.257 | -0.042 | -0.2   | -0.059 | 0.024  | -0.207 | 0.186  | -0.049 | 0.014  | 0.053  | -0.12  | -0.167 |
| -0.333 | -0.274 | 0.159  | -0.358 | 0.019  | 0.075  | -0.211 | -0.068 | -0.205 | 0.046  | -0.111 | -0.111 | -0.233 |
| -0.367 | -0.269 | -0.283 | -0.382 | -0.196 | -0.234 | -0.232 | -0.185 | -0.237 | -0.926 | -0.435 | -0.173 | -0.493 |
| -0.244 | -0.037 | -0.004 | -0.154 | -0.151 | -0.114 | -0.094 | -0.169 | -0.393 | -0.077 | 0.021  | -0.178 | -0.048 |
| -0.177 | -0.132 | -0.004 | -0.316 | -0.088 | -0.066 | 0.007  | -0.016 | -0.433 | -0.027 | -0.094 | 0.001  | -0.253 |
| -0.153 | 0.025  | 0.041  | -0.163 | -0.117 | -0.076 | 0.165  | 0.162  | -0.136 | 0.066  | 0.087  | 0.128  | -0.023 |
| -0.42  | -0.391 | -0.379 | -0.41  | -0.49  | -0.396 | -0.452 | -0.389 | -0.46  | -0.383 | -0.437 | -0.497 | -0.497 |
| -0.303 | -0.231 | -0.068 | -0.352 | -0.015 | -0.203 | -0.11  | 0.057  | -0.305 | 0.068  | -0.172 | -0.084 | -0.282 |
| -0.202 | 0.004  | -0.056 | -0.135 | -0.085 | 0.06   | -0.069 | -0.127 | -0.268 | 0.093  | 0.003  | -0.028 | 0.058  |
| 0.111  | 0.063  | 0.171  | 0.084  | -0.013 | 0.044  | 0.189  | 0.15   | -0.092 | 0.322  | 0.227  | 0.213  | -0.022 |
| 0.096  | 0.16   | 0.08   | -0.031 | 0.088  | 0.176  | 0.236  | 0.303  | 0.153  | 0.196  | -0.005 | 0.326  | 0.046  |
| -0.318 | 0.143  | 0.096  | -0.121 | 0.006  | 0.248  | 0.192  | 0.181  | 0.194  | 0.215  | 0.182  | 0.163  | 0.089  |

| USP8 high patients (n=38) |             |           |           |           |            |            |            |            |            |            |            |            |
|---------------------------|-------------|-----------|-----------|-----------|------------|------------|------------|------------|------------|------------|------------|------------|
| Sample. 402               | Sample .111 | Sample .7 | Sample. 8 | Sample. 9 | Sample. 12 | Sample. 13 | Sample .14 | Sample. 29 | Sample. 45 | Sample .51 | Sample .57 | Sample. 59 |
| -0.271                    | -0.079      | -0.327    | -0.344    | -0.183    | -0.18      | -0.318     | -0.264     | -0.335     | -0.188     | -0.185     | -0.255     | -0.208     |
| 0.103                     | -0.026      | -0.028    | -0.173    | -0.083    | -0.004     | -0.066     | 0.046      | 0.111      | 0.023      | -0.012     | 0.053      | 0.176      |
| -0.013                    | -0.118      | -0.347    | -0.106    | -0.236    | -0.182     | -0.143     | -0.25      | -0.312     | -0.219     | -0.107     | 0.03       | -0.279     |
| -0.239                    | -0.202      | -0.139    | -0.303    | -0.67     | -0.161     | -0.379     | -0.227     | -0.264     | -0.345     | -0.183     | -0.357     | -0.059     |
| 0.138                     | -0.147      | -0.092    | -0.129    | -0.216    | -0.188     | -0.111     | -0.08      | -0.149     | -0.161     | -0.188     | -0.271     | -0.077     |
| 0.031                     | 0.149       | 0.009     | 0.101     | 0.015     | 0.222      | 0.124      | 0.15       | 0.001      | 0.009      | 0.136      | 0.178      | 0.239      |
| -0.037                    | -0.255      | -0.098    | -0.139    | -0.141    | 0.183      | -0.096     | 0.013      | -0.133     | -0.13      | -0.057     | -0.036     | 0.033      |
| -0.099                    | 0.128       | -0.154    | -0.069    | -0.163    | -0.03      | -0.077     | -1.049     | -0.108     | -0.091     | -0.062     | 0.122      | 0.072      |
| 0.116                     | -0.507      | -0.467    | -0.574    | -0.567    | -0.438     | -0.59      | -0.373     | -0.56      | -0.436     | -0.426     | -0.669     | -0.352     |
| 0.011                     | -0.299      | -0.186    | -0.057    | -0.234    | -0.082     | -0.267     | 0.004      | -0.191     | -0.227     | 0.044      | -0.082     | 0.07       |
| 0.227                     | -0.321      | -0.147    | -0.23     | -0.376    | -0.201     | -0.014     | -0.124     | 0.05       | -0.266     | -0.341     | -0.637     | -0.34      |
| -0.071                    | 0.12        | -0.04     | -0.111    | -0.095    | 0.309      | -0.171     | 0.099      | 0.09       | -0.028     | 0.038      | -0.104     | 0.148      |
| -0.22                     | 0.019       | -0.041    | -0.185    | -0.125    | 0.003      | -0.059     | 0.099      | -0.108     | -0.124     | -0.12      | -0.243     | 0.132      |
| -0.132                    | 0.065       | 0.006     | -0.187    | -0.167    | 0.012      | -0.116     | 0.114      | -0.056     | -0.116     | -0.076     | -0.201     | 0.018      |
| -0.091                    | -0.275      | -0.045    | -0.107    | -0.211    | 0.019      | -0.144     | 0.078      | -0.07      | -0.159     | -0.1       | -0.086     | -0.011     |
| -0.132                    | 0.065       | 0.006     | -0.187    | -0.167    | 0.012      | -0.116     | 0.114      | -0.056     | -0.116     | -0.076     | -0.201     | 0.018      |
| -0.091                    | -0.275      | -0.045    | -0.107    | -0.211    | 0.019      | -0.144     | 0.078      | -0.07      | -0.159     | -0.1       | -0.086     | -0.011     |
| -0.106                    | -0.269      | 0.031     | -0.027    | 0.032     | 0.213      | 0.027      | 0.172      | 0.05       | 0.057      | 0.103      | -0.161     | 0.295      |
| -0.209                    | -0.047      | -0.02     | -0.139    | -0.062    | 0.166      | -0.011     | -0.014     | 0.009      | -0.062     | 0.012      | -0.104     | 0.02       |
| 0.025                     | 0.114       | -0.018    | 0.062     | -0.063    | 0.174      | 0.106      | 0.142      | -0.022     | 0.185      | 0.16       | 0.324      | 0.146      |
| -0.051                    | 0.104       | -0.112    | -0.116    | -0.199    | -0.032     | -0.145     | 0.22       | -0.051     | 0.089      | -0.052     | 0.095      | 0.128      |
| -0.278                    | -0.272      | -0.252    | -0.413    | -0.331    | -0.196     | -0.213     | -0.044     | -0.293     | -0.247     | -0.101     | -0.251     | -0.122     |
| -0.08                     | -0.145      | -0.144    | -0.139    | -0.243    | -0.035     | -0.175     | -0.014     | -0.221     | -0.167     | -0.125     | -0.052     | -0.012     |
| -0.116                    | -0.334      | 0.073     | -0.435    | -0.062    | 0.016      | -0.261     | -0.003     | -0.031     | -0.294     | 0.039      | -0.185     | -0.225     |
| 0.111                     | 0.18        | 0.003     | 0.146     | 0         | 0.098      | 0.107      | 0.001      | 0.06       | -0.048     | 0.021      | -0.097     | 0.104      |
| 0.086                     | -0.056      | -0.159    | -0.22     | 0.045     | -0.024     | 0.019      | -0.002     | 0.038      | -0.088     | 0.203      | -0.146     | -0.047     |
| 0.092                     | 0.059       | 0.004     | -0.023    | 0.053     | 0.241      | 0.058      | 0.019      | 0.07       | -0.02      | 0.173      | 0.225      | 0.066      |
| 0.025                     | -0.239      | -0.204    | 0.162     | -0.139    | -0.14      | -0.146     | -0.017     | -0.019     | -0.016     | 0.063      | 0.026      | -0.127     |
| 0.222                     | -0.113      | -0.014    | 0.04      | -0.13     | 0.167      | -0.011     | 0.156      | 0.092      | 0.111      | 0.174      | 0.209      | 0.155      |
| 0.069                     | 0.031       | -0.066    | -0.009    | -0.136    | 0.045      | 0.042      | 0.071      | -0.117     | -0.023     | 0.089      | 0.116      | 0.158      |
| -0.108                    | -0.03       | 0.01      | -0.142    | 0.007     | -0.02      | 0.015      | 0.115      | -0.025     | -0.011     | 0.017      | -0.109     | -0.048     |
| -0.131                    | -0.039      | -0.101    | -0.18     | -0.2      | -1.594     | -0.054     | 0.014      | -0.073     | -0.104     | 0.019      | -0.27      | -0.074     |
| -0.216                    | -0.077      | -0.145    | 0.053     | 0.001     | 0.01       | -0.004     | -0.018     | 0.003      | -0.034     | 0.191      | 0.285      | 0.194      |
| -0.248                    | 0.103       | -0.507    | -0.277    | -0.416    | -0.301     | -0.038     | -0.5       | -0.51      | -0.275     | -0.154     | 0.032      | -0.189     |
| -0.23                     | -0.115      | -0.152    | -0.14     | -0.061    | -0.087     | -0.153     | 0.036      | 0.031      | -0.125     | -0.032     | -0.284     | 0.083      |
| -0.186                    | -0.049      | 0.024     | -0.146    | -0.069    | 0.027      | -0.006     | 0.057      | -0.061     | 0.019      | 0.016      | -0.139     | 0.059      |
| -0.031                    | 0.007       | -0.156    | -0.09     | -0.181    | -0.105     | -0.071     | -0.062     | -0.17      | -0.088     | -0.03      | -0.091     | 0.083      |
| -0.04                     | -0.063      | -0.03     | -0.043    | -0.118    | 0.088      | -0.048     | 0.09       | -0.082     | -0.032     | -0.032     | -0.146     | -0.064     |
| -0.129                    | -0.036      | -0.039    | -0.251    | -0.22     | 0.043      | -0.121     | 0.064      | -0.211     | -0.105     | -0.077     | -0.146     | 0.042      |
| -0.009                    | -0.235      | -0.122    | -0.087    | -0.131    | -0.03      | -0.02      | -0.03      | -0.113     | -0.136     | 0.018      | 0.076      | 0.073      |
| 0.037                     | 0.028       | 0.01      | -0.022    | -0.082    | 0.127      | -0.039     | 0.119      | 0.061      | -0.1       | 0.008      | -0.077     | 0.001      |
| -0.113                    | 0.04        | -0.099    | -0.026    | 0.035     | -0.317     | 0.069      | -0.956     | -0.003     | 0.081      | 0.084      | 0.082      | 0.064      |
| -0.116                    | -0.108      | -0.235    | -0.093    | -0.25     | 0.049      | -0.071     | -0.259     | -0.21      | -0.161     | 0.022      | -0.05      | -0.026     |
| -0.047                    | -0.039      | -0.178    | -0.142    | -0.156    | -0.125     | -0.105     | -0.063     | -0.128     | -0.032     | -0.066     | -0.133     | 0.073      |
| -0.245                    | -0.299      | -0.361    | -0.3      | -0.424    | -0.363     | -0.479     | -0.194     | -0.176     | -0.213     | -0.188     | -0.073     | -0.226     |
| -0.109                    | 0.121       | 0.085     | 0.099     | 0.061     | -0.917     | 0.09       | 0.19       | 0.141      | 0.113      | 0.262      | 0.261      | 0.315      |
| -0.002                    | -0.213      | -0.172    | -0.219    | -0.283    | -0.202     | -0.25      | -0.011     | -0.235     | -0.045     | -0.063     | -0.216     | -0.159     |

|        |        |        |        |        |        |        |        |        |        |        |        |        |
|--------|--------|--------|--------|--------|--------|--------|--------|--------|--------|--------|--------|--------|
| -0.276 | 0.529  | 0.181  | -0.217 | 0.078  | -2.128 | 0.178  | 0.731  | 0.449  | 0.663  | 0.494  | -0.016 | 0.475  |
| -0.07  | 0.033  | 0.098  | 0.082  | 0.107  | 0.03   | 0.222  | 0.188  | 0.11   | 0.358  | 0.211  | 0.044  | 0.169  |
| -0.205 | -0.294 | -0.231 | -0.344 | -0.334 | -0.35  | -0.381 | -0.296 | -0.264 | -0.285 | -0.183 | -0.355 | -0.147 |
| 0.102  | 0.21   | 0.148  | 0.131  | 0.158  | 0.257  | 0.309  | 0.258  | 0.153  | 0.23   | 0.271  | 0.265  | 0.287  |
| -0.093 | -0.019 | 0.063  | -0.058 | -0.209 | 0.006  | -0.138 | 0.079  | 0.027  | -0.086 | -0.169 | -0.269 | 0.018  |
| -0.228 | -0.334 | -0.253 | -0.186 | -0.391 | -0.167 | -0.009 | 0.029  | -0.1   | -0.132 | -0.076 | -0.098 | -0.089 |
| -0.151 | 0.065  | -0.034 | 0.001  | -0.097 | 0.202  | -0.188 | 0.136  | 0.046  | 0.016  | 0.058  | -0.092 | 0.243  |
| 0.299  | 0.223  | -0.033 | -0.057 | -0.117 | -0.068 | -0.081 | 0.178  | -0.093 | -0.108 | -0.116 | 0.106  | 0.179  |
| 0.094  | 0.196  | 0.118  | 0.128  | 0.159  | 0.106  | 0.125  | 0.179  | 0.128  | 0.23   | 0.118  | 0.143  | 0.216  |
| -0.172 | -0.005 | -0.106 | -0.088 | -0.229 | -0.073 | -0.217 | -0.08  | -0.226 | -0.038 | -0.235 | -0.356 | -0.107 |
| 0.053  | 0.266  | 0.295  | 0.154  | 0.215  | 0.12   | 0.167  | 0.425  | 0.308  | 0.288  | 0.159  | -0.092 | 0.18   |
| -0.173 | 0.044  | -0.181 | -0.16  | -0.204 | -0.213 | -0.098 | -0.056 | -0.117 | -0.109 | -0.051 | -0.073 | 0.027  |
| -0.37  | -0.054 | -0.283 | -0.205 | -0.323 | -0.189 | -0.338 | -0.101 | -0.15  | -0.23  | -0.106 | -0.213 | 0.084  |
| -0.231 | -0.114 | -0.159 | -0.227 | -0.194 | -0.167 | -0.196 | -0.102 | -0.139 | -0.228 | -0.09  | -0.228 | -0.092 |
| -0.185 | -0.633 | -0.578 | -0.645 | -0.568 | -0.59  | -0.582 | -0.384 | -0.368 | -0.494 | -0.368 | -0.694 | -0.462 |
| -0.399 | -0.479 | -0.311 | -0.615 | -0.398 | -0.382 | -0.362 | -0.092 | -0.312 | -0.286 | -0.232 | -0.384 | -0.436 |
| 0.328  | 0.045  | 0.019  | 0.151  | -0.051 | -0.082 | -0.025 | 0.343  | 0.158  | 0.161  | 0.196  | 0.07   | 0.162  |
| -0.063 | -0.114 | -0.179 | -0.165 | -0.195 | -0.144 | -0.081 | -0.086 | -0.21  | -0.096 | -0.144 | -0.22  | -0.019 |
| -0.4   | -0.52  | -0.476 | -0.326 | -0.556 | -0.401 | -0.577 | -0.382 | -0.437 | -0.541 | -0.281 | -0.376 | -0.195 |
| -0.183 | -0.062 | -0.251 | -0.007 | -0.21  | -0.144 | -0.082 | -0.035 | -0.123 | -0.269 | 0.017  | 0.001  | 0.151  |
| -0.085 | -0.114 | -0.241 | -0.219 | -0.364 | -0.193 | -0.276 | -0.058 | -0.282 | -0.306 | -0.158 | -0.388 | -0.102 |
| -0.157 | -0.019 | -0.385 | 0.002  | -0.241 | 0.251  | -0.326 | -0.23  | -0.104 | 0.111  | -0.144 | -0.434 | 0.155  |
| -0.328 | 0.019  | -0.141 | -0.223 | -0.264 | -1.267 | -0.153 | 0.002  | -0.066 | -0.121 | 0.003  | -0.084 | 0.034  |
| -0.244 | -0.027 | -0.028 | -0.084 | -0.117 | -0.254 | -0.069 | 0.046  | 0.032  | 0.055  | -0.02  | 0.006  | -0.046 |
| -0.179 | -0.05  | -0.155 | -0.049 | -0.114 | 0.101  | -0.136 | -0.2   | -0.021 | -0.106 | 0.099  | 0.151  | -0.026 |
| -0.073 | -0.235 | -0.09  | 0.018  | -0.076 | 0.097  | 0.078  | -0.069 | -0.15  | -0.04  | 0.016  | 0.123  | 0.034  |
| -0.289 | -0.039 | -0.211 | -0.198 | -0.277 | -0.089 | -0.132 | -0.013 | -0.188 | -0.171 | -0.149 | -0.244 | -0.028 |
| -0.146 | 0.307  | -0.187 | -0.233 | -0.222 | -0.143 | -0.134 | -0.056 | -0.14  | -0.182 | -0.155 | -0.364 | -0.096 |
| 0.01   | -0.124 | -0.202 | -0.182 | -0.203 | -0.11  | -0.131 | -0.033 | -0.202 | -0.05  | -0.03  | -0.193 | 0.122  |
| 0.03   | 0.083  | -0.258 | -0.156 | 0.09   | -0.214 | -0.007 | 0.095  | 0.022  | -0.083 | -0.027 | 0.043  | 0.077  |
| -0.452 | -0.466 | -0.451 | -0.498 | -0.457 | -0.371 | -0.44  | -1.526 | -0.45  | -0.411 | -0.389 | -0.506 | -0.421 |
| -0.062 | -0.077 | -0.283 | -0.295 | -0.377 | -0.135 | -0.222 | -0.13  | -0.352 | -0.307 | -0.183 | -0.238 | -0.137 |
| -0.26  | -0.066 | -0.258 | -0.176 | -0.401 | -0.244 | -0.186 | -0.078 | -0.197 | -0.348 | -0.185 | -0.261 | -0.093 |
| 0.086  | 0.302  | 0.189  | 0.113  | 0.113  | 0.125  | 0.18   | 0.195  | 0.145  | 0.188  | 0.151  | 0.06   | 0.153  |
| -0.002 | -0.077 | -0.206 | -0.043 | -0.281 | 0.001  | -0.198 | 0.072  | -0.066 | -0.204 | -0.074 | -0.104 | -0.149 |
| 0.106  | 0.034  | 0.049  | 0.119  | 0.024  | 0.131  | 0.186  | 0.163  | 0.138  | 0.141  | 0.16   | 0.25   | 0.152  |

**Appendix Table S2. Heatmap of TGF- $\beta$  target genes by qRT-PCR analysis**

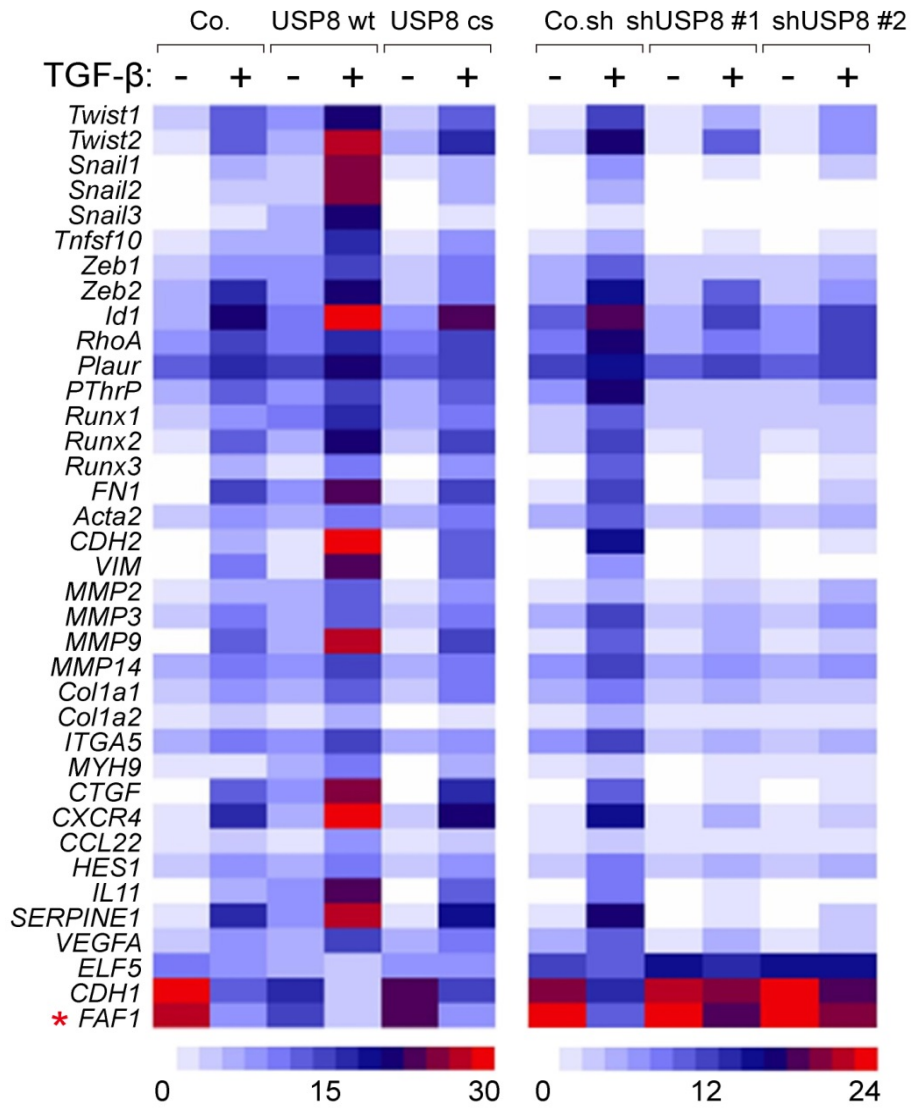

### Appendix Table S3. Primers list

| Gene    | Forward                            | Reverse                         |
|---------|------------------------------------|---------------------------------|
| TWIST1  | 5'-GCGCTGCGGAAGATCATC-3'           | 5'-AGGGTCTGAATCTTGCTCAGCTT-3'   |
| TWIST2  | 5'-CACGCTGCCCTCTGACAAG-3'          | 5'-CTGCAGGACCTGGTAGAGGAA-3'     |
| SNAIL1  | 5'-CCCCAATCGGAAGCCTAACT-3'         | 5'-GCTGGAAGGTAAACTCTGGATTAGA-3' |
| SNAIL2  | 5'-CAGCTACCCAATGGCCTCTCT-3'        | 5'-GGACTCACTCGCCCCAAA-3'        |
| TNFSF10 | 5'-TCCTGGGAATCATCAAGGAG-3'         | 5'-CAAGTGCAAGTTGCTCAGGA-3'      |
| ZEB1    | 5'-TGTGAATGGGCGACCAAGA-3'          | 5'-GTGGGACTGCCTGGTGATG-3'       |
| ZEB2    | 5'-AAGATAGGTGGCGCGTGT-3'           | 5'-GACTGACGTGTTACGCCTCTTCTAA-3' |
| RHOA    | 5'-CGGTCCCTCCGTCGGTTCT-3'          | 5'-GAGACGAAGGCGGGTAGCT-3'       |
| RUNX1   | 5'-CCCTAGGGGATGTTCCAGAT-3'         | 5'-TGAAGCTTTTCCCTCTTCCA-3'      |
| RUNX2   | 5'-GCACAAGTAAATCATTGAACTACAGAAA-3' | 5'-GAAGCCTGGCGATTTAGAGTTTT-3'   |
| MMP3    | 5'-AGAGGCATCCACACCCTAGGT-3'        | 5'-TATCAGAAATGGCTGCATCGAT-3'    |
| MMP9    | 5'-GGACGATGCCTGCAACGT-3'           | 5'-CAAATACAGCTGGTCCCAATCT-3'    |
| VIM     | 5'-GGCTCGTCACCTTCGTGAAT-3'         | 5'-TCTCAATGTCAAGGGCCATCT-3'     |
| MYH9    | 5'-GAAGAGCTAGAGGCGCTGAA-3'         | 5'-CTTTGCCTTCTCGAGTTTTG-3'      |
| COL1A1  | 5'-CTGTTCTGTTCTTGTGTAAGTGTGTT-3'   | 5'-TGCCCCGGTGACACATC-3'         |
| COL1A2  | 5'-CTGAAGTCTCTCAACAACCAGATTG-3'    | 5'-TGTGCGAGCTGGGTTCTTT-3'       |
| NANOG   | 5'-AAAGCTTGCTTGTCTTTGAA-3'         | 5'-TTTCTTCAGGCCACAAATC-3'       |
| SOX2    | 5'-TGCGAGCGCTGCACAT-3'             | 5'-TCATGAGCGTCTTGGTTTTCC-3'     |
| OCT4    | 5'-CGACCATCTGCCGCTTTG-3'           | 5'-GCCGCAGCTTACACATGTTCT-3'     |
| TAZ     | 5'-CGACAGCTCCCATGGAA-3'            | 5'-GGGTTGACAGCAGCCTGAAC-3'      |
| USP8    | 5'-CTCCGGAGTCTGAAAGATGC-3'         | 5'-CATTGCGCAGGACAGTTTTA-3'      |
| ANXA5   | 5'-TTTGATGAGCGGGCTGATG-3'          | 5'-ATCTGTGCCAAGCCTTCA-3'        |
| CD81    | 5'-CCAGCACACTGACTGCTTTGA-3'        | 5'-GCCCGAGGGACACAAATTG-3'       |
| CD9     | 5'-GAAACGCTGAAAGCCATCCA-3'         | 5'-ACGCCCCAGCCAAAC-3'           |
| CHMP2A  | 5'-GCTGGGACTTAGCCTAACAGATG-3'      | 5'-AAGCGAGCCCCAGTTG-3'          |
| HRS     | 5'-GCCACGAGCAGTTCCTGAAG-3'         | 5'-TCATGCGGTTACGAAGGT-3'        |
| HSP60   | 5'-GCAATGTGTCCAGAGCAAGA-3'         | 5'-AAGCTCAACAGCTGGGAAAA-3'      |
| HSP70   | 5'-TGACACGACATTGGGAGGTA-3'         | 5'-AATGCACGGATTTGGACTT-3'       |
| HSP90   | 5'-CGACGTGCTCCTTTTGTCT-3'          | 5'-TTCAGGGATTAGCTCCTCACA-3'     |
| HSPA5   | 5'-ACCAGGAATGAATTGAAAGC-3'         | 5'-CAGCTTTTCCATGGTTTCT-3'       |
| HSPA8   | 5'-AAGGCAAGATTAACGATGAGGA-3'       | 5'-CAAATTCTTCTCAGCAGTC-3'       |
| TSG101  | 5'-TGCCTATGGCTACTGGACAC-3'         | 5'-TTTGCATCAACATGCTTTCC-3'      |
| VPS25   | 5'-TGGCCGTGGCAGTATCG-3'            | 5'-TGTCCACATTGGTTGTAACG-3'      |
| SNAIL3  | 5'-CTTCCTGGTGAAAACGCACT-3'         | 5'-AGAGCAGGCACCATTGATTT-3'      |
| ID1     | 5'-GGACGAGCAGCAGGTAAACG-3'         | 5'-TGGGCACCAGCTCCTTGA-3'        |
| PLAUR   | 5'-CTGGAGCTGGTGGAGAAAAG-3'         | 5'-CTTCAAGCCAGTCCGATAGC-3'      |
| PTHRP   | 5'-CCGCCTCAAAGAGCTGTGT-3'          | 5'-GGATGGACTTCCCCTTGTCA-3'      |
| RUNX3   | 5'-TCGGAAGTGAACCCATTCTC-3'         | 5'-ATAATGCATCCTGGGGTCTG-3'      |
| FN1     | 5'-ACCAACCTACGGATGACTCG-3'         | 5'-AACGGCATAATGGGAAACTG-3'      |
| ACTA2   | 5'-ACCCACAATGTCCCATCTA-3'          | 5'-GAAGGAATAGCCACGCTCAG-3'      |
| CDH2    | 5'-TAGCCCGTTTTTCATTTGAGG-3'        | 5'-CAATGTCAATGGGGTTCTCC-3'      |
| MMP2    | 5'-TGAGCTATGGACCTGGGAGAA-3'        | 5'-CCATCGGCGTTCCCATAC-3'        |
| MMP14   | 5'-GGCTCGAGCATTCCAGTGA-3'          | 5'-GCACAAAATTCTCCGTGCCAT-3'     |



|          |                              |                                 |
|----------|------------------------------|---------------------------------|
| ITGA5    | 5'-GCACCAACAAGAGAGCCAAAG-3'  | 5'-CTCCCGCTGCAAGAAAGTCT-3'      |
| CTGF     | 5'-AGCCGCCTGTGCATGGT-3'      | 5'-TTTTGCCCTTCTTAATGTTCTCTTC-3' |
| CXCR4    | 5'-GAACCCTGTTTCCGTGAAGA-3'   | 5'-GTAGATGGTGGGCAGGAAGA-3'      |
| CCL22    | 5'-CGCGTGGTCAAACACTTCTA-3'   | 5'-CGGCACAGATCTCCTTATCC-3'      |
| HES1     | 5'-GGGAAAGATTGCAAGGTGAA-3'   | 5'-GGTGGAACTCCTTCAGGACA-3'      |
| IL11     | 5'-GACAAATCCAGCTGACG-3'      | 5'-AGGGAATCCAGGTTGTGGTC-3'      |
| SERPINE1 | 5'-GAGCTTTTGTGTGCCTGGTAGA-3' | 5'-GGCAGGCAGTACAAGAGTGATG-3'    |
| VEGFA    | 5'-ACGAGGGCCTGGAGTGTGT-3'    | 5'-TGAGGTTTGATCCGCATAATCTG-3'   |
| ELF5     | 5'-CAAGGCCACCATCAAAGACT-3'   | 5'-TGCCACTTGTTTTCAAGCAG-3'      |
| CDH1     | 5'-ACAGCCCCGCCTTATGATT-3'    | 5'-TCGGAACCGCTTCCTTCA-3'        |
| ALIX     | 5'-CAACAAAGCATTGCCAGAGA-3'   | 5'-TGAGGACTGATACGCAGGTG-3'      |
| CD63     | 5'-GCTGTGGGGCTGCTAACTAC-3'   | 5'-TCGACATGGAAGGGATTTTC-3'      |
| HRS      | 5'-TGTGGGCAGATATTCTGTGG-3'   | 5'-GGGATGGTGGAGTACTTGGA-3'      |
| RAB11A   | 5'-TTGCAACAAGAAGCATCCAG-3'   | 5'-CCCTGCTGTGTCCCATATCT-3'      |
| RAB27A   | 5'-AAATGGTCATGCCTCTACGG-3'   | 5'-ACATGCCCTTTCTCCTTTT-3'       |
| RAB27B   | 5'-ACTTTCGGGAAAAACGTGTG-3'   | 5'-TTCCCTGAAGATCCATTCG-3'       |
| CDH11    | 5'-CCTATTTTTCGGTGGAAGCA-3'   | 5'-GGGTAGGGCTGTTCTGATGA-3'      |
| TGFBR2   | 5'-TGTCTGTGGATGACCTGGCTAA-3' | 5'-TTCTGGAGCCATGTATCTTGCA-3'    |
