# Supplementary material
Source: PubMed Central journal article supplement (PMC9379553)

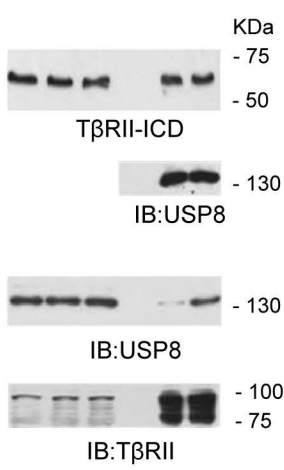

Figure 3b

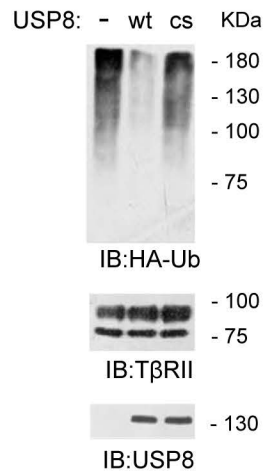

Figure 3c

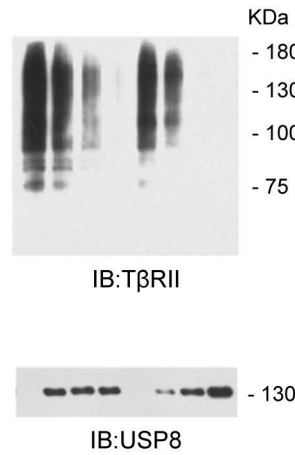

Figure 3d

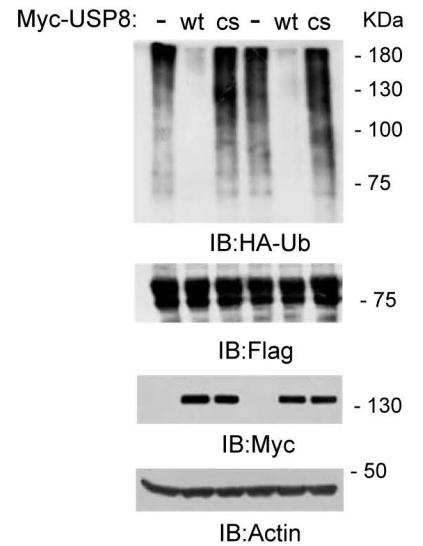

Figure 3e

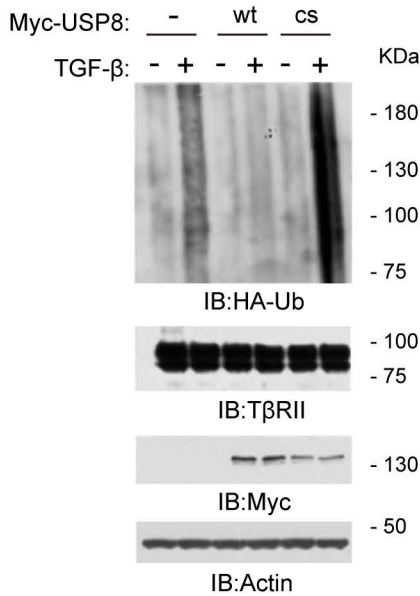

Figure 3f

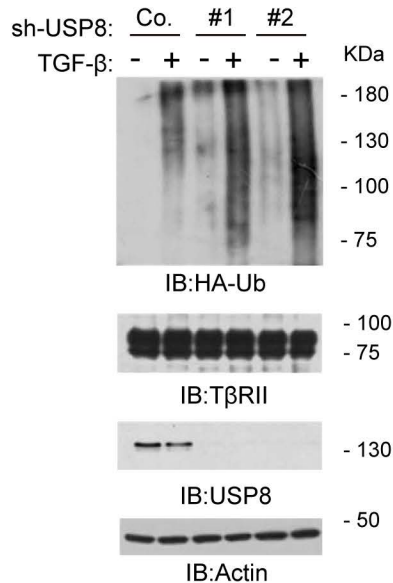

Figure 3f

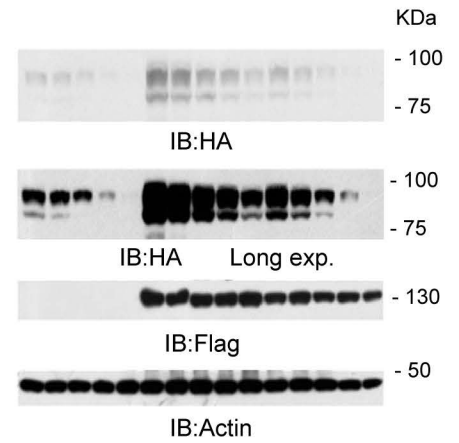

Figure 3g

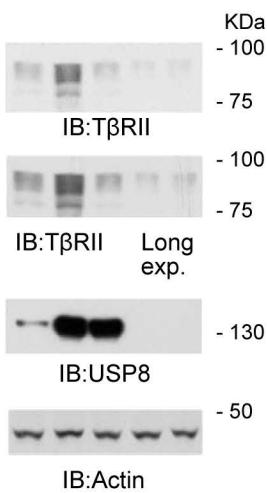

Figure 3h

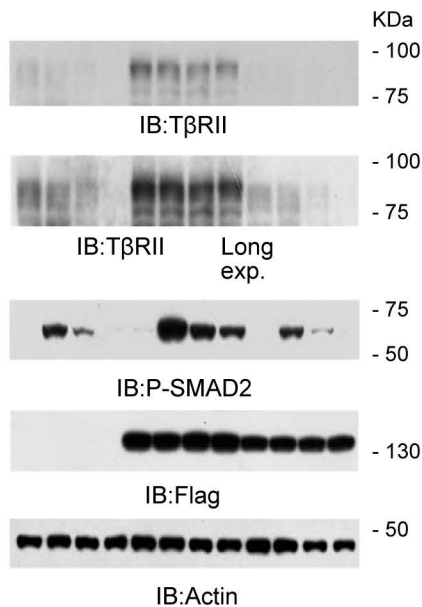

Figure 3i

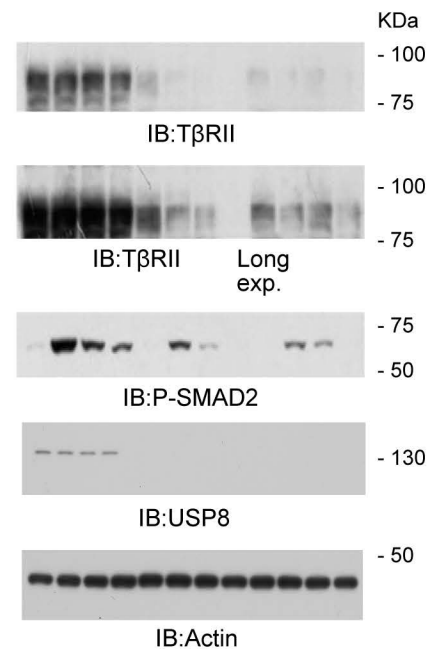

Figure 3j

Supplement: EMBJ-41-e108791-s001.pdf [file EMBJ-41-e108791-s001.pdf]

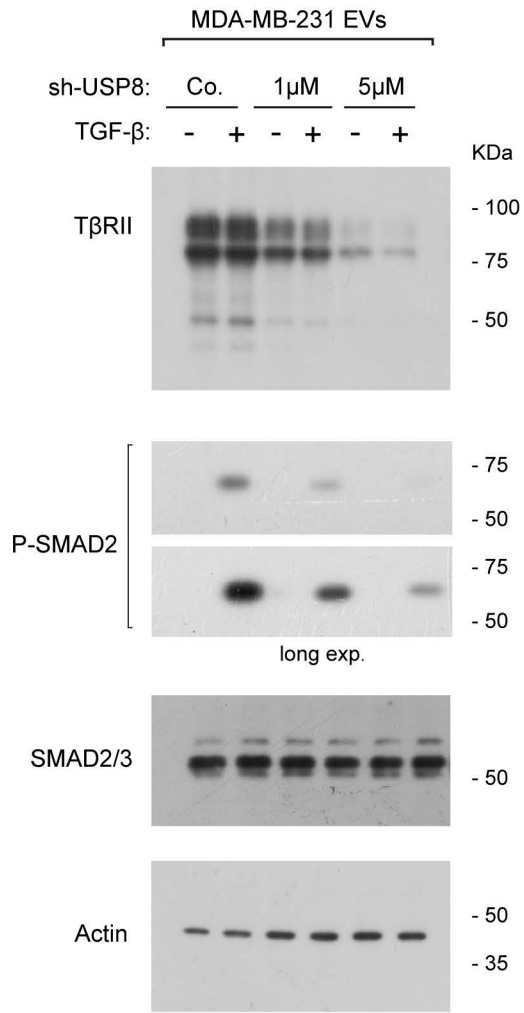

Figure 6c

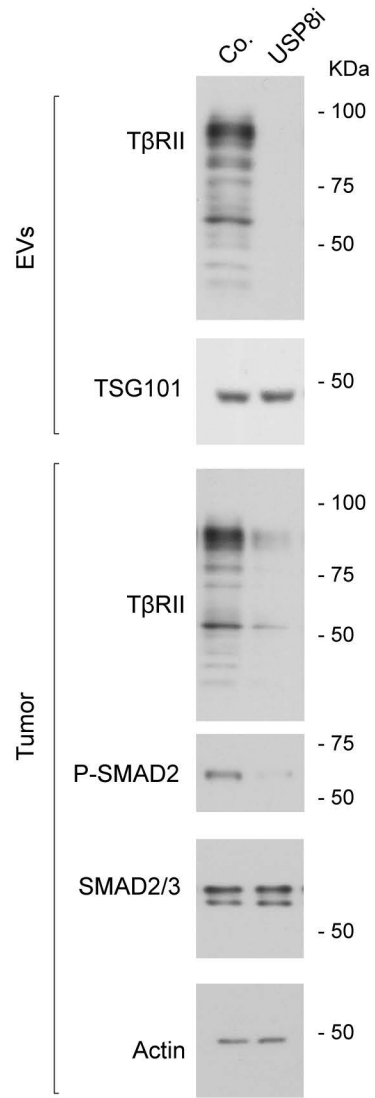

Figure 6n

Supplement: EMBJ-41-e108791-s002.pdf [file EMBJ-41-e108791-s002.pdf]

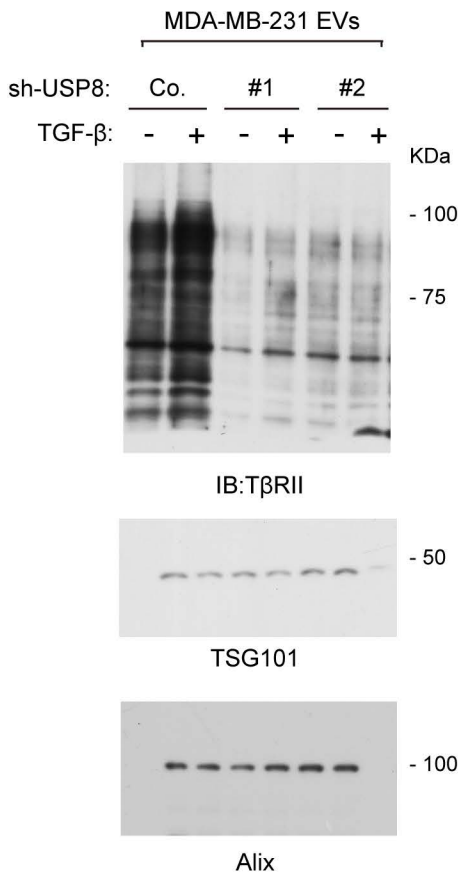

Figure 5f

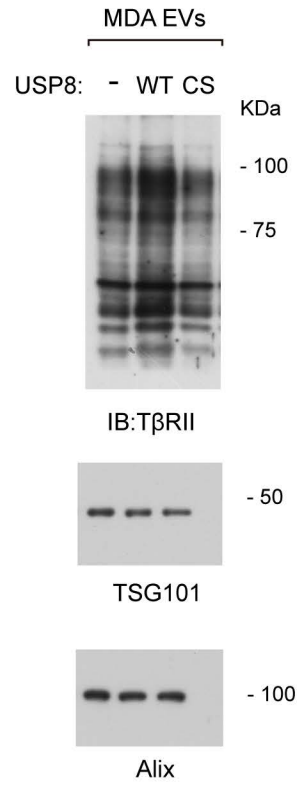

Figure 5g

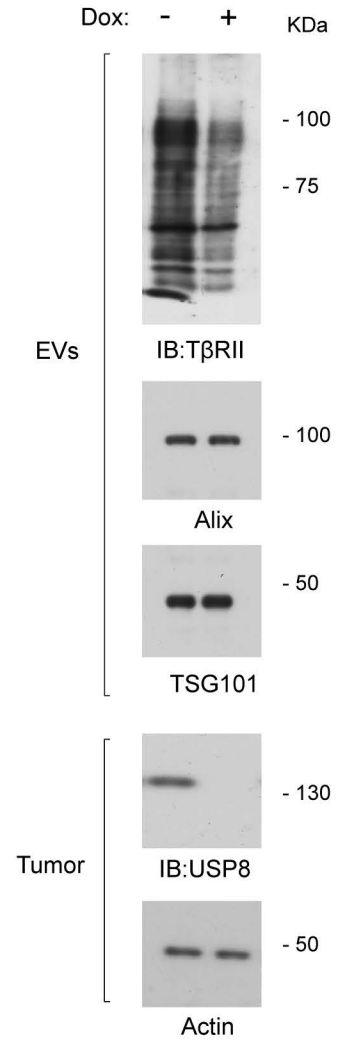

Figure 5j

Supplement: EMBJ-41-e108791-s003.pdf [file EMBJ-41-e108791-s003.pdf]

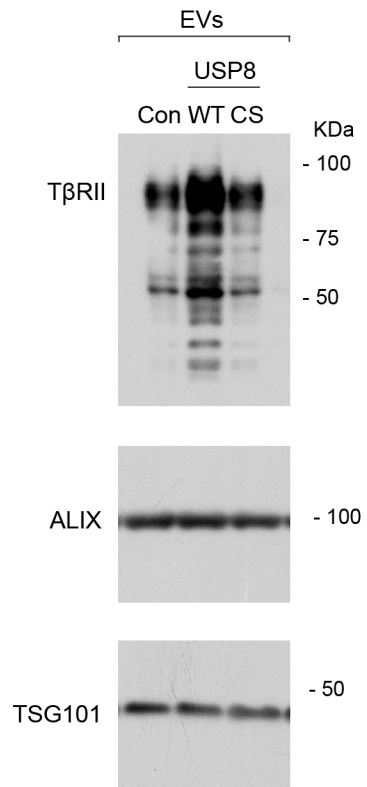

Figure 4k

Supplement: EMBJ-41-e108791-s005.pdf [file EMBJ-41-e108791-s005.pdf]

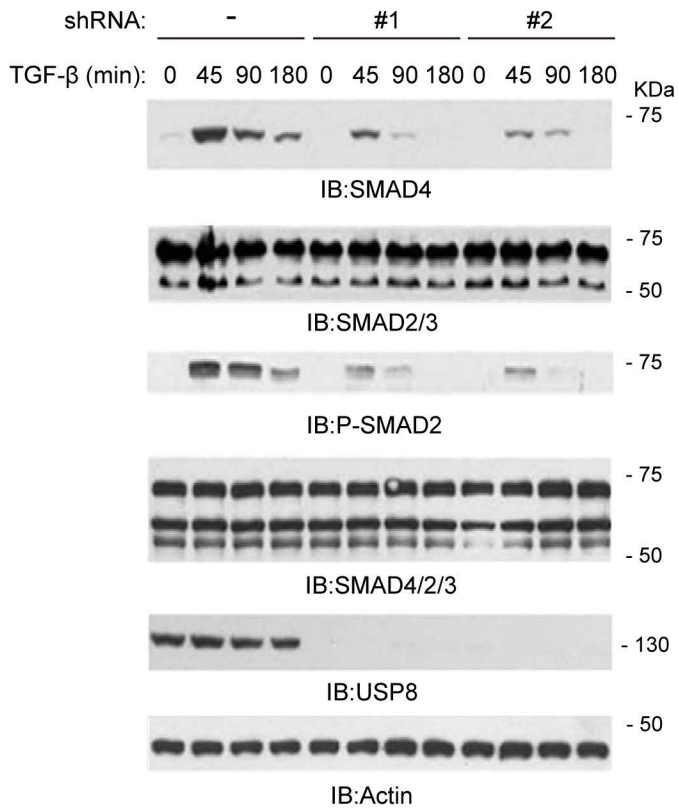

Figure 2i

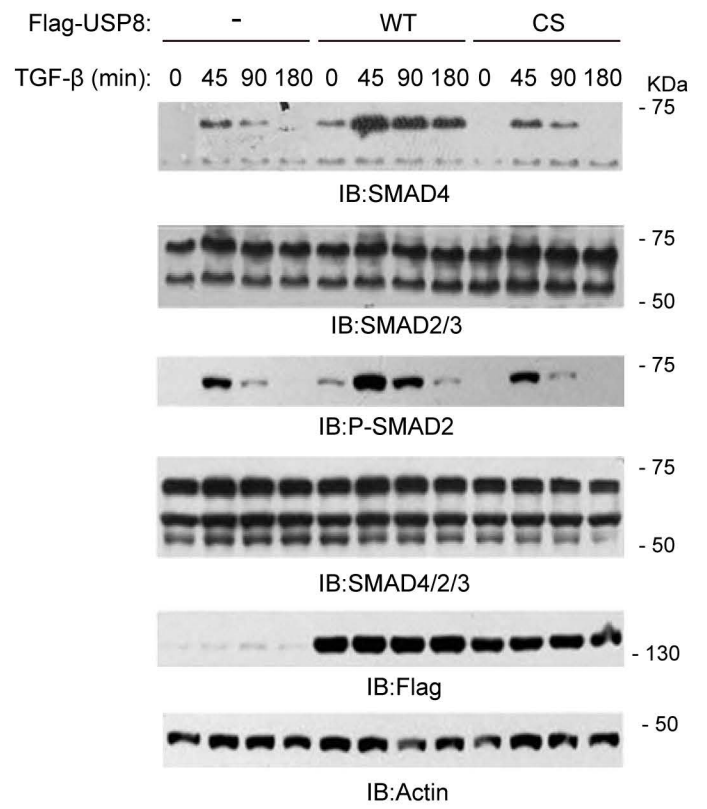

Figure 2i

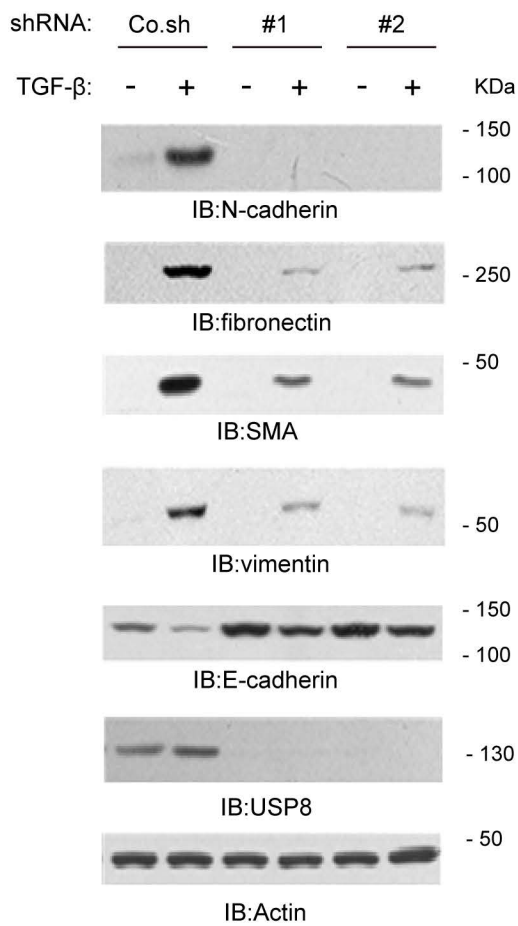

Figure 2k

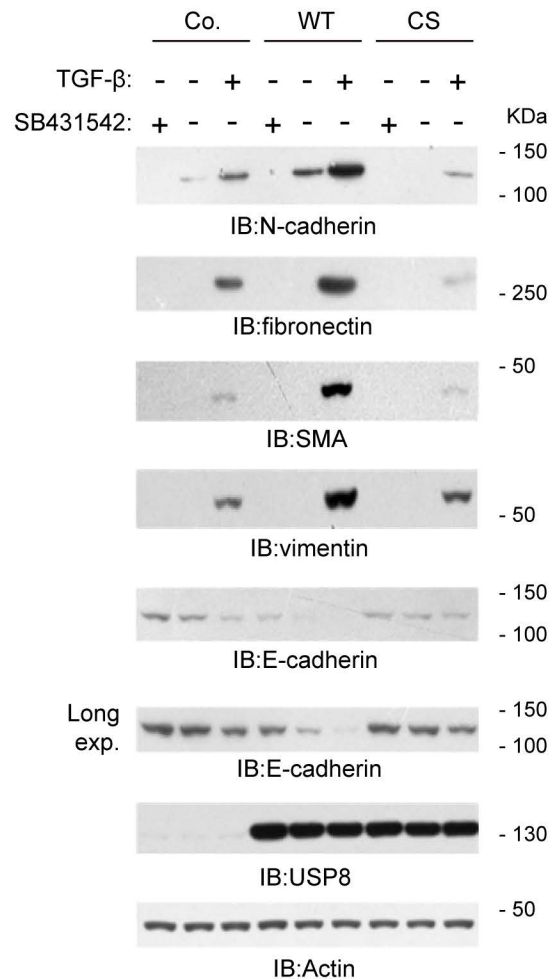

Figure 2k

Supplement: EMBJ-41-e108791-s007.pdf [file EMBJ-41-e108791-s007.pdf]

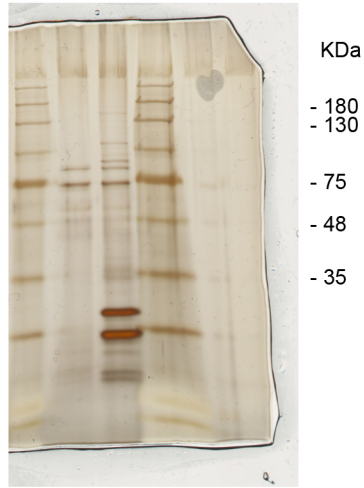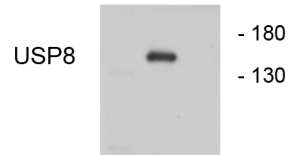

Figure 1a

Supplement: EMBJ-41-e108791-s010.pdf [file EMBJ-41-e108791-s010.pdf]
